# Supplementary material for: Protein-coding gene promoters in Methanocaldococcus (Methanococcus) jannaschii
Source: PubMed Central journal article supplement — Nucleic Acids Res. 2009 Apr 9;37(11):3588–601. doi: 10.1093/nar/gkp213 (PMC2699501; doi:10.1093/nar/gkp213), 2009-04-09
Supplement: gkp213_1.pdf [file gkp213_1.pdf]

**Table S1.** Gene-specific primers

| Primer name <sup>a</sup> | Primer sequence                      |
|--------------------------|--------------------------------------|
| MJ0006-PE                | 5'-CCACATCCAACACTACAACCTGGGC-3'      |
| MJ0007-PE                | 5'-CTACTGGCGAATTTTTGCATCAAC-3'       |
| MJ0135-PE                | 5'-CATTGGACCCAAAACAGGCCCTCTTCC-3'    |
| MJ0136-PE                | 5'-GCAAAGAGGTATGGCTTCCTAATGTTGC-3'   |
| MJ0201-PE                | 5'-GTTGGGAATGGTTGAAATATTGGCTCAG-3'   |
| MJ0202-PE                | 5'-CTCATTAGCGGCATCAACGACCTGCC-3'     |
| MJ0209-PE                | 5'-CCGTGAGCTATCAATCCAGCCTTAGC-3'     |
| MJ0210-PE                | 5'-GCTCTCAGGAACTGGGATACCATAC-3'      |
| MJ0318-PE                | 5'-CTGCAAATGTATCTTCAATATATACTCC-3'   |
| MJ0319-PE                | 5'-GGCTTCAATATATCTAAAACAATTCTCC-3'   |
| MJ0369-PE                | 5'-ATTATGCAAACCCATAACCAATAG-3'       |
| MJ0370-PE                | 5'-TAGAAATTTACGTTATGACCTCCG-3'       |
| MJ0405-PE                | 5'-GGACAGCCTGAGCAATAGGCATTAATTC-3'   |
| MJ0406-PE                | 5'-GCAGTATGCCCTACACATGTAATCTTC-3'    |
| MJ0428-PE                | 5'-GTAACCCAAACCAATTACACATATCC-3'     |
| MJ0429-PE                | 5'-CCAATCCTCCAGAATACGCTAAGACAGC-3'   |
| MJ0666-PE                | 5'-CAATCTTTTCAGCACTTTTTAAGGGC-3'     |
| MJ0667-PE                | 5'-CTCTATCTTGAGGGAAATACTGAGAGC-3'    |
| MJ0672-PE                | 5'-GAGAAGCTGTAATTATCCCTAAGC-3'       |
| MJ0673-PE                | 5'-CTACTTCTTCCTTGCCATACTC-3'         |
| MJ0696-PE                | 5'-CCAAACAATATAGGCATTGCTTTC-3'       |
| MJ0697-PE                | 5'-GCCATCTCCTAAATCAACTTCATAG-3'      |
| MJ0746-PE                | 5'-GTCCAACCTCCATGCTTTCACC-3'         |
| MJ0822-PE                | 5'-GCTGTAGCAACCATTGCCCTCCAAC-3'      |
| MJ0823-PE                | 5'-CCTACTCCTCCTTTTCCAGTTATTGC-3'     |
| MJ0825-PE                | 5'-CGTATCCGTCATAGCTAATCTTTACC-3'     |
| MJ0826-PE                | 5'-GGCACTATAGCTTCCAATGCTATCAC-3'     |
| MJ0841-PE                | 5'-CAGTTAATTCCTGGTTCTCCTCTC-3'       |
| MJ0842-PE                | 5'-GTGTCTTTGTACTTTACCATAGG-3'        |
| MJ0864-PE                | 5'-GCCTCAATAACCTCATTTACGAAG-3'       |
| MJ0865-PE                | 5'-CCAATGAGCATGGCACCATAAG-3'         |
| MJ0890-PE                | 5'-GCATCATCATTTTTTCATGTTTTACC-3'     |
| MJ0891-PE                | 5'-CATGGCCCCCTCTTACC-3'              |
| MJ0922-PE                | 5'-CAAACGCTTCTACTACTCCCTCATGTC-3'    |
| MJ0923-PE                | 5'-CTGTTCCAATAAACATTAGAAATAACATC-3'  |
| MJ0952-PE                | 5'-GTATATTTCTAAGGCCATTGCTTTCTGTC-3'  |
| MJ0953-PE                | 5'-CTACATCAACCCAAGATTCGCATATTG-3'    |
| MJ0986-PE                | 5'-CCCACTGACTCTTAGTGAATGTAACCTTG-3'  |
| MJ0987-PE                | 5'-GCATCAATTGAGCTTGAATTTGTGGTGG-3'   |
| MJ0990-PE                | 5'-CTGGGCAGATGTCTCCAGTAACATCAAG-3'   |
| MJ0991-PE                | 5'-CCTCTTCAATCTTTTTCTTTGAAATATTGG-3' |
| MJ0999-PE                | 5'-CTTCCAACGTATCTCTTAACGTTTTGTGG-3'  |
| MJ1000-PE                | 5'-CTCCTCTGGTAAAAAATCTCTCGTCCC-3'    |

MJ1018-PE 5'-GCATCTTCATGCAATGGGTCTG-3'  
 MJ1019-PE 5'-CCTCTTTCTCTGCTCCAAAACC-3'  
 MJ1035-PE 5'-CAACTGGGGACATTCCTATGTTACCACAC-3'  
 MJ1036-PE 5'-GCTCGCCAATACACATGACAATAAAGC-3'  
 MJ1053-PE 5'-CATGCTCTAACTTGTCTATTTCTGTC-3'  
 MJ1054-PE 5'-CCTGTATTAAGCCAACATAACCAGTCCC-3'  
 MJ1099-PE 5'-GCTTCTTCAACATCTATAGGGCTTAC-3'  
 MJ1100-PE 5'-TTTTTCATTCTTATTCCAGAAGTCCC-3'  
 MJ1146-PE 5'-GCATTGAAACTGCATCGGCTACTC-3'  
 MJ1147-PE 5'-CTCTCCCTTCTCCAAACATTCAAC-3'  
 MJ1157-PE 5'-CATTCTTTACATAGATGCCTATTTGAGTAC-3'  
 MJ1158-PE 5'-GTGTAAATCTCAATTATCTGGTCTGCCTCC-3'  
 MJ1185-PE 5'-CCCAAGTTATTGGTAAAACAGTTTTTCTC-3'  
 MJ1186-PE 5'-GTTCCATACAACCACATAGGACTGTTCC-3'  
 MJ1197-PE 5'-GTTTTCTGTTTCTCTGCAATCTTGG-3'  
 MJ1224-PE 5'-CATGTGGTTTTTCTTCACTCAATAAC-3'  
 MJ1225-PE 5'-GGGCTTTTCTTATTGTAGTTGTAGG-3'  
 MJ1248-PE 5'-CTCCTCAATGACTTTTTATCAATTCC-3'  
 MJ1249-PE 5'-CTGGGATTGATGACTCTAATGCTGTTG-3'  
 MJ1265-PE 5'-GCATCTGGTTTTAAAGCTACAAAGGTTCC-3'  
 MJ1266-PE 5'-GTTTCCTGATTTTGTGTGCATCCTGC-3'  
 MJ1332-PE 5'-GAACATTGTTGATTTCCCTACGTTTGG-3'  
 MJ1333-PE 5'-CAAGTATTCAACTGTGGCAACCAACTC-3'  
 MJ1334-PE 5'-GGTAATAGTCGAGTCCCAAACCAGC-3'  
 MJ1335-PE 5'-GCTGAGAGTTAGCTGCACTCCTCC-3'  
 MJ1403-PE 5'-CCATGGGAGACCGTCATCGG-3'  
 MJ1404-PE 5'-GAGACAGGTGTATCAGGTGTTACTG-3'  
 MJ1423-PE 5'-CCTAAGTTGATACATTGCAGCAGC-3'  
 MJ1424-PE 5'-GTCAAACACTATAACTCTATCTCC-3'  
 MJ1486-PE 5'-CCTAACTCTCCACTTCCTAACAAC-3'  
 MJ1533-PE 5'-CTTCAAGATTCATAAATGTCACCTTC-3'  
 MJ1534-PE 5'-CAGAGCTTTTGTATTGGCTCGTTTGG-3'  
 MJ1585-PE 5'-CTGTCTTCTGGAAGTGTAGTGGCAC-3'  
 MJ1586-PE 5'-GCCATTTCTTTGGTGTTATAACCTC-3'  
 MJ0006-RACE-SP1 Same as MJ0006-PE  
 MJ0007-RACE-SP1 5'-GCTTATATAGCTGTTCTTTTCTACTGGCG-3'  
 MJ0007-RACE-SP2 Same as MJ0007-PE  
 MJ0035-RACE-SP1 5'-CCCATTATTGTATAAGCTAAGGTTG-3'  
 MJ0035-RACE-SP2 5'-GCATGAATCTCATTTTCTCTACAG-3'  
 MJ0068-RACE-SP1 5'-GTTACGCTTATAGCGTCTTCAAC-3'  
 MJ0084-RACE-SP1 5'-CGTCTCCATCAATAACCAAGAC-3'  
 MJ0084-RACE-SP2 5'-CCTTTTTTAGCAAACCTCCTTTGCC-3'  
 MJ0094-RACE-SP1 5'-CAAACCTCCGATATCCTCAATCC-3'  
 MJ0113-RACE-SP1 5'-GGTGTGTTGAGGAATAACTATTGGAG-3'  
 MJ0113-RACE-SP2 5'-ATCCTCAATCTCAATTCTACCAAC-3'

MJ0135-RACE-SP1 5'-GCAAAAGCACAAACAACCATTGG-3'  
MJ0135-RACE-SP2 Same as MJ0135-PE  
MJ0136-RACE-SP1 5'-GTATGGAACATCTCTTCCCTTCATAG-3'  
MJ0136-RACE-SP2 Same as MJ0136-PE  
MJ0150-RACE-SP1 5'-CTTACTGCTTGAAATATAGATAAGGG-3'  
MJ0150-RACE-SP2 5'-CGTTCTTTCTGGAGGATGGTTG-3'  
MJ0161-RACE-SP1 5'-CTCTGTTATTCCGACTGTAATACTTG-3'  
MJ0161-RACE-SP2 5'-GAAATTCTCTGCAATACTCCTGG-3'  
MJ0168-RACE-SP1 5'-GCTGCTCTGCTAACTCTCTCAGC-3'  
MJ0176-RACE-SP1 5'-CTTGGACTGAATGCTAATGAACC-3'  
MJ0199-RACE-SP1 5'-CACATTCTGCACACTCTGC-3'  
MJ0201-RACE-SP1 Same as MJ0201-PE  
MJ0202-RACE-SP1 5'-CCGCACTCTCACCATAAACATC-3'  
MJ0202-RACE-SP2 Same as MJ0202-PE  
MJ0205-RACE-SP1 5'-GGATGGTCTGCCAACAATTGGAC-3'  
MJ0209-RACE-SP1 Same as MJ0209-PE  
MJ0210-RACE-SP1 Same as MJ0210-PE  
MJ0217-RACE-SP1 5'-ACCAACAACCTGGCTCTCCTG-3'  
MJ0217-RACE-SP2 5'-AGCTCCTTTCATTCCCTCTG-3'  
MJ0223-RACE-SP1 5'-TTTGCTTCTTCCTCTGCCTT-3'  
MJ0223-RACE-SP2 5'-TGCTTCTTCAATTGCCTCTG-3'  
MJ0224-RACE-SP1 5'-TGGTTTGGATGTTGAGGCA-3'  
MJ0224-RACE-SP2 5'-TGTGAGCTTCATGCCATCTTG-3'  
MJ0237-RACE-SP1 5'-CAGAATAATCTCCTAACTCTAAGTTTGG-3'  
MJ0237-RACE-SP2 5'-GTCAATCTCTTTACATATCTCTTTGC-3'  
MJ0252-RACE-SP1 5'-CTGTCCCAGTAGATAAAAATAAAGG-3'  
MJ0252-RACE-SP2 5'-GCTCTATCTCTATCCAAAACGTC-3'  
MJ0269-RACE-SP1 5'-CTCTTCTCTCAACACCAAAGAATGG-3'  
MJ0269-RACE-SP2 5'-GTAACAGCTCCTTGTCTCCTC-3'  
MJ0299-RACE-SP1 5'-CAACTCATCTGGAGCTAATGTGTG-3'  
MJ0307-RACE-SP1 5'-GGACAGTGAGGACACATTGGTG-3'  
MJ0313-RACE-SP1 5'-CATTGTTGTTATGATACTCTGTAAACC-3'  
MJ0318-RACE-SP1 5'-GACTTTTTAGGGTGGCATATCTG-3'  
MJ0318-RACE-SP2 Same as MJ0318-PE  
MJ0319-RACE-SP1 Same as MJ0319-PE  
MJ0369-RACE-SP1 5'-GAGATAGCAGGAAGTTTAACCATTACC-3'  
MJ0369-RACE-SP2 Same as MJ0369-PE  
MJ0370-RACE-SP1 5'-TTCCTTATCCTCTGGAGACAATTC-3'  
MJ0370-RACE-SP2 5'-CCTCTAATTTACTCCCTTCTCTAAAACG-3'  
MJ0387-RACE-SP1 5'-GGATGGTCTATAGAGTAGGATGC-3'  
MJ0387-RACE-SP2 5'-AATAGATTTGGTAATGAATGGTCTTC-3'  
MJ0400-RACE-SP1 5'-GATACCCCATGGTCCATTGGAAC-3'  
MJ0400-RACE-SP2 5'-CTCTCCAACCTTACAAGTTTTCC-3'  
MJ0405-RACE-SP1 Same as MJ0405-PE  
MJ0406-RACE-SP1 5'-CCATAATACTTTCTCGCCGAAGG-3'

MJ0406-RACE-SP2 Same as MJ0406-PE  
MJ0428-RACE-SP1 5'-CCACACCAATAACATCAAATCCC-3'  
MJ0428-RACE-SP2 Same as MJ0428-PE  
MJ0429-RACE-SP1 5'-CTGTCCAACATCCACACAGAC-3'  
MJ0445-RACE-SP1 5'-GCATCTAACTCTAACCCCTACTTGC-3'  
MJ0445-RACE-SP2 5'-TCCCAACATCTGCTCTATAATCC-3'  
MJ0450-RACE-SP1 5'-GCAACATCATATACTGATACATCC-3'  
MJ0499-RACE-SP1 5'-CCTGTAATATCATGAACCATTGCTAC-3'  
MJ0499-RACE-SP2 5'-CTCCAGGACTAACTTCCTTCTTTCC-3'  
MJ0507-RACE-SP1 5'-TGCCTCTTCTTTGCTCTTAGC-3'  
MJ0507-RACE-SP2 5'-AAAGCAACTTTTGGCACTGA-3'  
MJ0510-RACE-SP1 5'-CTGGCTTCCTCATGTCAATCTC-3'  
MJ0510-RACE-SP2 5'-CTGTGTGAAGTTTCTCGGCTTCG-3'  
MJ0533-RACE-SP1 5'-GGACATACTATTGTGCATAACTTACAG-3'  
MJ0533-RACE-SP2 5'-CTCCAACGCACGCTCCAC-3'  
MJ0537-RACE-SP1 5'-GAAACAGCTATATAGTCCTCTGGC-3'  
MJ0537-RACE-SP2 5'-CCAGAACAGAAGATGTGTGGC-3'  
MJ0547-RACE-SP1 5'-CAGCGTCCAAAACAGCCAC-3'  
MJ0547-RACE-SP2 5'-CGTTGTCTTTCCAGTACCTCC-3'  
MJ0555-RACE-SP1 5'-CCTCCCTCCCAGATATTCC-3'  
MJ0561-RACE-SP1 5'-GGTCCTACTCCTCCTCTTGC-3'  
MJ0561-RACE-SP2 5'-CTTTCCTTTTCCTTCATCTCCCC-3'  
MJ0622-RACE-SP1 5'-CTGGTTGTATCACTTCTTGATAAGGC-3'  
MJ0660-RACE-SP1 5'-CGAAGACAACGAATCCTTCAACTC-3'  
MJ0660-RACE-SP2 5'-GGTTTCGCCTTCTTTAACTGG-3'  
MJ0666-RACE-SP1 5'-CCTGTTTAAAGCTTCAACAATATCAACTTC-3'  
MJ0666-RACE-SP2 Same as MJ0666-PE  
MJ0667-RACE-SP1 5'-GTGGAAGCCCTATTTCTCCTCTG-3'  
MJ0667-RACE-SP2 Same as MJ0667-PE  
MJ0672-RACE-SP1 Same as MJ0672-PE  
MJ0673-RACE-SP1 5'-GCTGGTCTATAACAACCCACCTG-3'  
MJ0673-RACE-SP2 Same as MJ0673-PE  
MJ0676-RACE-SP1 5'-GCCAATCTTCCAATATCTCCACC-3'  
MJ0676-RACE-SP2 5'-CCTCCATTAAGTATGTTATCTCC-3'  
MJ0696-RACE-SP1 Same as MJ0696-PE  
MJ0697-RACE-SP1 5'-CGTGAGATGGTGTAGTTCAGC-3'  
MJ0697-RACE-SP2 Same as MJ0697-PE  
MJ0720-RACE-SP1 5'-CTCAAATGGCAAACCAGTAGCTTC-3'  
MJ0720-RACE-SP2 5'-GTTGCTGGAACAACCTCTTTACC-3'  
MJ0721-RACE-SP1 5'-GCTTCAACAACCTTTGGATGAC-3'  
MJ0721-RACE-SP2 5'-TCTTCCGTAGATTTGGAGATGG-3'  
MJ0732-RACE-SP1 5'-GAACATGTAATCCTTTGCAGTGTC-3'  
MJ0732-RACE-SP2 5'-CCGTAGGGAGTTCCATAGCCATG-3'  
MJ0746-RACE-SP1 5'-CCGTTCAATTCAGCAAAGTG-3'  
MJ0765-RACE-SP1 5'-GCTGCCTCTTGACATTGGAAGC-3'

MJ0784-RACE-SP1 5'-GGTTATTCCTGCTGCTGCG-3'  
MJ0800-RACE-SP1 5'-GAGTTCTCCACCAACTTTTTGTGC-3'  
MJ0800-RACE-SP2 5'-CGTGATAAACTCCGCTCCATTC-3'  
MJ0822-RACE-SP1 5'-GCATGAACGGTTATGTCAGCAC-3'  
MJ0822-RACE-SP2 Same as MJ0822-PE  
MJ0823-RACE-SP1 5'-GGA ACTATCTCTTCCTCAACTCC-3'  
MJ0823-RACE-SP2 Same as MJ0823-PE  
MJ0825-RACE-SP1 5'-CAACTTCTCTTTCCTCACC-3'  
MJ0825-RACE-SP2 Same as MJ0825-PE  
MJ0826-RACE-SP1 5'-GTGAGACTCCTTCAACTCCTAC-3'  
MJ0826-RACE-SP2 5'-GCTATCACTAAAAAGCCTGCC-3'  
MJ0841-RACE-SP1 5'-CAGCTAACGTCTCCTCCAGC-3'  
MJ0841-RACE-SP2 Same as MJ0841-PE  
MJ0842-RACE-SP1 5'-CTCTACCTTTAATCATAACAACC-3'  
MJ0847-RACE-SP1 5'-CGCAACTGCAACATACAAACC-3'  
MJ0847-RACE-SP2 5'-CTTCTGCACATCCAGCAACTG-3'  
MJ0864-RACE-SP1 Same as MJ0864-PE  
MJ0865-RACE-SP1 Same as MJ0865-PE  
MJ0882-RACE-SP1 5'-CCAATAACACCATAACCACAGCC-3'  
MJ0882-RACE-SP2 5'-CCTTTCCATAAGAGAAAACCCAC-3'  
MJ0890-RACE-SP1 Same as MJ0890-PE  
MJ0891-RACE-SP1 5'-CAGCCCCTAAAGTTGCAGTTG-3'  
MJ0891-RACE-SP2 Same as MJ0891-PE  
MJ0922-RACE-SP1 Same as MJ0922-PE  
MJ0923-RACE-SP1 Same as MJ0923-PE  
MJ0936-RACE-SP1 5'-CCATAAGTGGCTATGATATTGGCG-3'  
MJ0936-RACE-SP2 5'-CCCACAATGAATAACAGTCTCAAC-3'  
MJ0952-RACE-SP1 5'-AACACTCCAGGACCTACTGG-3'  
MJ0952-RACE-SP2 Same as MJ0952-PE  
MJ0953-RACE-SP1 Same as MJ0953-PE  
MJ0968-RACE-SP1 5'-CCTTCTCTATTTATCGGTGGG-3'  
MJ0968-RACE-SP2 5'-CCACTATATCAACCGTCTGGC-3'  
MJ0986-RACE-SP1 5'-GGTTCTCACAATTCAGCATCAG-3'  
MJ0986-RACE-SP2 Same as MJ0986-PE  
MJ0987-RACE-SP1 5'-CTGTCTCAACACTCTGCTTCTGC-3'  
MJ0987-RACE-SP2 Same as MJ0987-PE  
MJ0990-RACE-SP1 Same as MJ0990-PE  
MJ0991-RACE-SP1 Same as MJ0991-PE  
MJ0999-RACE-SP1 Same as MJ0999-PE  
MJ1000-RACE-SP1 Same as MJ1000-PE  
MJ1018-RACE-SP1 Same as MJ1018-PE  
MJ1018-RACE-SP2 5'-TAACCATGTCTATTCACCATTTTCATC-3'  
MJ1019-RACE-SP1 Same as MJ1019-PE  
MJ1035-RACE-SP1 Same as MJ1035-PE  
MJ1036-RACE-SP1 Same as MJ1036-PE  
MJ1053-RACE-SP1 5'-CCCTCTTTCATCATCTC-3'

MJ1053-RACE-SP2 Same as MJ1053-PE  
MJ1054-RACE-SP1 Same as MJ1054-PE  
MJ1099-RACE-SP1 5'-GGGACGTCTCCAAGTGTAGC-3'  
MJ1099-RACE-SP2 Same as MJ1099-PE  
MJ1100-RACE-SP1 5'-GAGGGTTGTGAGAGGCAGT-3'  
MJ1100-RACE-SP2 Same as MJ1100-PE  
MJ1146-RACE-SP1 5'-CAACTTGTAGCCCTTCTCAAC-3'  
MJ1146-RACE-SP2 Same as MJ1146-PE  
MJ1147-RACE-SP1 Same as MJ1147-PE  
MJ1157-RACE-SP1 Same as MJ1157-PE  
MJ1158-RACE-SP1 5'-TCTTCAATCCCCACCCTTCT-3'  
MJ1158-RACE-SP2 Same as MJ1158-PE  
MJ1185-RACE-SP1 Same as MJ1185-PE  
MJ1186-RACE-SP1 5'-CCTGGGCTTCAGAGTTTTGC-3'  
MJ1186-RACE-SP2 Same as MJ1186-PE  
MJ1197-RACE-SP1 Same as MJ1197-PE  
MJ1224-RACE-SP1 5'-CTCCTTTTTATCCTATGCCTTTTACCG-3'  
MJ1224-RACE-SP2 Same as MJ1224-PE  
MJ1225-RACE-SP1 Same as MJ1225-PE  
MJ1225-RACE-SP2 5'-GTAGTTGTAGGATAAACAGTTACAATC-3'  
MJ1228-RACE-SP1 5'-CTACAATTTACATGGAAGTCCATC-3'  
MJ1246-RACE-SP1 5'-GTGAAACTTCCCTGCCTTCCAG-3'  
MJ1248-RACE-SP1 Same as MJ1248-PE  
MJ1249-RACE-SP1 5'-CCTTGCAACCTCTGAAGCAAATC-3'  
MJ1249-RACE-SP2 5'-GTCTAAGGAATGGGAGGCAAC-3'  
MJ1259-RACE-SP1 5'-CACTGGCTCCAAGTTCTCTTCC-3'  
MJ1259-RACE-SP2 5'-CAGCTTTTGCTCCTTCTTTGG-3'  
MJ1260-RACE-SP1 5'-GGGAAACCGCTTGAGTCAG-3'  
MJ1260-RACE-SP2 5'-CTAATGGTGTGTTATCTGCCTC-3'  
MJ1265-RACE-SP1 Same as MJ1265-PE  
MJ1266-RACE-SP1 5'-GACTTCACCACTTGCC-3'  
MJ1266-RACE-SP2 Same as MJ1266-PE  
MJ1311-RACE-SP1 5'-GGTAATGAGTTCCCTCACAGAC-3'  
MJ1311-RACE-SP2 5'-CCATGCATCAAAGTTGTGTTTCAGC-3'  
MJ1332-RACE-SP1 Same as MJ1332-PE  
MJ1333-RACE-SP1 Same as MJ1333-PE  
MJ1334-RACE-SP1 5'-GGAAGCATCTCCTTCGGTTGAG-3'  
MJ1334-RACE-SP2 Same as MJ1334-PE  
MJ1335-RACE-SP1 5'-CCCAAAGCTTCAACTTGCCTCTC-3'  
MJ1335-RACE-SP2 Same as MJ1335-PE  
MJ1338-RACE-SP1 5'-CTTGAACCGCCATAAGGTGG-3'  
MJ1403-RACE-SP1 5'-CTTTAACCAGTCCATCATCTTCCCACCTC-3'  
MJ1403-RACE-SP2 Same as MJ1403-PE  
MJ1404-RACE-SP1 5'-CGACCTAACTTCTTCATCTGTTG-3'  
MJ1404-RACE-SP2 Same as MJ1404-PE  
MJ1423-RACE-SP1 5'-TTGCACACGTCCCAACTATG-3'

MJ1423-RACE-SP2 Same as MJ1423-PE  
 MJ1424-RACE-SP1 Same as MJ1424-PE  
 MJ1486-RACE-SP1 5'-CTTGTGAGCAACCTGCATAGC-3'  
 MJ1486-RACE-SP2 Same as MJ1486-PE  
 MJ1533-RACE-SP1 Same as MJ1533-PE  
 MJ1534-RACE-SP1 Same as MJ1534-PE  
 MJ1543-RACE-SP1 5'-CCATGATGCTCCATTTGGTCTC-3'  
 MJ1543-RACE-SP2 5'-GCTTGAGCTCTTCCTTGACTTCC-3'  
 MJ1555-RACE-SP1 5'-GCACTGTCCCTTCTCTATCTC-3'  
 MJ1555-RACE-SP2 5'-GCTCTAATTGAATGAACCCATCCC-3'  
 MJ1585-RACE-SP1 5'-GTTCAATCTTCTGGTCTCCAGCG-3'  
 MJ1585-RACE-SP2 Same as MJ1585-PE  
 MJ1586-RACE-SP1 5'-CAACAAACCCATCTCCTCCG-3'  
 MJ1586-RACE-SP2 Same as MJ1586-PE  
 MJ1592-RACE-SP1 5'-CCTTGTTTGACATCATGCTTAGC-3'  
 MJ1592-RACE-SP2 5'-GCCTTCCACTGTATAATGGCTG-3'  
 MJ1597-RACE-SP1 5'-GCACACGCCTCTCTAACTGC-3'  
 MJ1597-RACE-SP2 5'-CTCTCTCATCCACTCGTGCTG-3'  
 MJ1619-RACE-SP1 5'-CTCTTCCCCATCTTCCTTTCCC-3'  
 MJ1619-RACE-SP2 5'-CTCTTTGGCATAGTCGTTTGTTG-3'  
 MJ1636-RACE-SP1 5'-GCTTTCCAGCTTCCAGGGAC-3'  
 MJ1636-RACE-SP2 5'-CCACAGTCCAAAACAGTAGCTCC-3'  
 MJ1656-RACE-SP1 5'-GCTCTTTTGC GTGGTCTATGTAG-3'  
 MJ1656-RACE-SP2 5'-CCTACACAGATGATTTTTGTTGGC-3'  
 MJ0318-EMSA-F 5'-GGATTTATCGAATATTA AAAACCAAATG-3'  
 MJ0318-EMSA-R 5'-CTGCAAATGTATCTTCAATATATACTCC-3'  
 MJ0319-EMSA-F 5'-CGATAAATCCATAAATAAAAATATATCAAC-3'  
 MJ0319-EMSA-R 5'-GGCTTCAATATATCTAAAACAATTCTCC-3'  
 MJ0746-EMSA-F 5'-GAGAAAGGTATTGTTATCGAGGATG-3'  
 MJ0746-EMSA-R 5'-GTCCA ACTCCATGCTTTCACC-3'  
 MJ0822-EMSA-F 5'-GTTATAACCGTTTCATATCGTAAG-3'  
 MJ0822-EMSA-R 5'-GCTGTAGCAACCATTGCCCTCCAAC-3'  
 MJ0842-EMSA-F 5'-CGATTTTGTTC AAATGAAAACTGG-3'  
 MJ0842-EMSA-R 5'-GTGTCTTTGTACTTTACCATAGG-3'  
 MJ0891-EMSA-F 5'-GACTACGCAATAAATTACGCAAAAAG-3'  
 MJ0891-EMSA-R 5'-CATGGCCCCCTCTTACC-3'  
 MJ1053-EMSA-F 5'-CTTGACAGTCTCCTCTGAAATCTAC-3'  
 MJ1053-EMSA-R 5'-CATGCTCTAACTTGTCTATTTCTGTC-3'  
 MJ1054-EMSA-F 5'-CTTAACAGCCTCTGGTATTGATAACG-3'  
 MJ1054-EMSA-R 5'-CCTGTATTAAGCCAACATAACCAGTCCC-3'  
 MJ1265-EMSA-F 5'-AATAACTTCCGTATCAAAAAGC-3'  
 MJ1265-EMSA-R 5'-GCATCTGGTTTTAAAGCTACAAAGGTTTC-3'  
 MJ1266-EMSA-F 5'-AATATTGTTGGTTAAATCTATCTCG-3'  
 MJ1266-EMSA-R 5'-GTTTCCTGATTTTGTGTGCATCCTGC-3'  
 MJ1404-EMSA-F 5'-CACATTTCTTAATACGTA ACTGCTG-3'

MJ1404-EMSA-R      5'-GAGACAGGTGTATCAGGTGTTACTG-3'  
MJ1534-EMSA-F      5'-CGATTTGCGGTAAATAGAAAAC-3'  
MJ1534-EMSA-R      5'-CCAAATTTCAATCTCACCCCTC-3'

---

<sup>a</sup>Primers named with a suffix “-PE” were used for primer extension analyses, “-RACE-SP1” for reverse transcription in 5'-RACE, “-RACE-SP2” for PCR in 5'-RACE (when different from “-RACE-SP1”), and “-EMSA-F” and “-EMSA-R” as forward and reverse primers for PCR amplification of the competitor DNAs in the competition EMSA assays.
