# Supplementary material for: Protein-coding gene promoters in Methanocaldococcus (Methanococcus) jannaschii
Source: PubMed Central journal article supplement — Nucleic Acids Res. 2009 Apr 9;37(11):3588–601. doi: 10.1093/nar/gkp213 (PMC2699501; doi:10.1093/nar/gkp213), 2009-04-09
Supplement: gkp213_2.pdf [file gkp213_2.pdf]

**Table S2.** Mapped transcription start sites (TSS)

| Gene <sup>a</sup> | Score (bit) <sup>b</sup> | BRE/TATA box sequence | TSS <sup>c</sup>          | Coord <sup>d</sup> | Dir <sup>e</sup> | Dist (nt) <sup>f</sup> | PE <sup>g</sup> | RACE <sup>h</sup> | Protein detected <sup>i</sup> | Div <sup>j</sup> |
|-------------------|--------------------------|-----------------------|---------------------------|--------------------|------------------|------------------------|-----------------|-------------------|-------------------------------|------------------|
| MJ0007            | 10.71                    | AAGATAAGATTTTTATG     | ACTCTTTTAA <b>t</b> gAATT | 8805               | +                | 82                     | +               | +                 | +                             | +                |
| MJ0035            | 10.77                    | ATGGTAATCTTTTTATT     | AAAAATATAT <b>C</b> gCCTT | 37321              | -                | 52                     | ND              | +                 | +                             | +                |
| MJ0068            | 12.25                    | AACAATAACTTTAAATA     | CTAAGGTAAT <b>T</b> aATAA | 65915              | -                | 54                     | ND              | +                 | +                             | +                |
| MJ0084            | 12.06                    | TTAGAAAAAGATTTATA     | TAGGTTTTAA <b>t</b> tAAAT | 78718              | +                | 28                     | ND              | +                 | +                             | -                |
| MJ0094            | 7.92                     | CTGGTAAAAAATAAAAA     | AGATAGTTTT <b>T</b> aAGAA | 89505              | -                | 24                     | ND              | +                 | +                             | -                |
| MJ0113            | 14.65                    | ATAATAACGTTTATATA     | AACTTAATCT <b>T</b> aATCT | 111553             | -                | 38                     | ND              | +                 | +                             | +                |
| MJ0136A           | 13.92                    | GCAGTAAGCATTTTATA     | AATATTTAA <b>A</b> aCTAC  | 131332             | +                | 135                    | +               | +                 | +                             | +                |
| MJ0136B           | 6.93                     | TAAAGAATATTTAAATA     | TATAGTTTT <b>T</b> TgCAA  | 131355             | +                | 112                    | +               | +                 | +                             | +                |
| MJ0161A           | 16.30                    | TCCCAAAAATTTATATA     | TAAATCCTAT <b>T</b> aCCCA | 165485             | -                | 326                    | ND              | +                 | +                             | +                |
| MJ0161B           | 10.26                    | ATCATAATTATTATATG     | ATATCTATTT <b>T</b> aTTAT | 165200             | -                | 41                     | ND              | +                 | +                             | +                |
| MJ0168            | 19.63                    | ACCGAAAAGTTTAAATA     | CAGTATTTAT <b>T</b> gGAAA | 171034             | -                | 24                     | ND              | +                 | +                             | +                |
| MJ0176            | 18.83                    | ACCAAAAATTTTATATA     | TATTTGTTTAT <b>a</b> CACT | 178134             | +                | 286                    | ND              | +                 | +                             | +                |
| MJ0199            | 14.52                    | TCCGATAATTATATATA     | CTTAATCAAT <b>T</b> aTTAA | 192346             | +                | 36                     | ND              | +                 | +                             | -                |
| MJ0201            | 11.88                    | AAGATAAGTTATAAATA     | TCTTAAACA <b>A</b> aCGGC  | 193495             | -                | 12                     | -               | +                 | -                             | +                |
| MJ0202            | 8.94                     | TAAGAATTC TTAAATA     | TAATCATATTT <b>a</b> TCgC | 193488             | +                | 88                     | -               | +                 | +                             | +                |
| MJ0205            | 13.72                    | AGCAAAAGATATTAATA     | AAAATTTAA <b>A</b> gAGGG  | 198495             | -                | 45                     | ND              | +                 | +                             | -                |
| MJ0217            | 6.25                     | AGCTGAAAAGTATAAAAG    | AAAATATA <b>A</b> aAGGT   | 209106             | -                | 159                    | ND              | +                 | +                             | -                |
| MJ0223            | 17.07                    | ATAAAAAATTTTATATA     | AAAATATT <b>a</b> CAATAA  | 214490             | -                | 19                     | ND              | +                 | +                             | -                |
| MJ0224A           | 8.82                     | TGCAAAAGATAAAATATA    | TTCCCAT <b>A</b> ATTaTAAA | 215116             | -                | 47                     | ND              | +                 | -                             | +                |
| MJ0224B           | 10.36                    | AAAGATAAATATATATT     | TAATTATA <b>A</b> AAaCCTA | 215110             | -                | 41                     | ND              | +                 | -                             | +                |
| MJ0237            | 8.99                     | CCCATTGGGTTTTTATA     | TAAATAAGTT <b>T</b> aTTTG | 227871             | +                | 149                    | ND              | +                 | +                             | +                |
| MJ0252            | 8.84                     | ACATCAACTTTTTTATA     | AAACTATA <b>a</b> CGCAAAA | 238826             | +                | 20                     | ND              | +                 | +                             | +                |
| MJ0269            | 16.17                    | CTCCAAAAC TTTTATATA   | AATTGTT <b>A</b> ATgATTGA | 255926             | -                | 28                     | ND              | +                 | +                             | -                |
| MJ0299            | 15.97                    | AAAGTTAAATTTTATATA    | TAAATATA <b>A</b> aTTAA   | 282956             | -                | 41                     | ND              | +                 | +                             | +                |
| MJ0307            | 20.41                    | TTGGAAAAC TATTTTATA   | AAATTT <b>T</b> TATTaTAAA | 288310             | -                | 30                     | ND              | +                 | +                             | -                |
| MJ0313            | 16.26                    | ATGCAAAAATTTT TATA    | TAATTA <b>a</b> CATTaCTCC | 293490             | -                | 55                     | ND              | +                 | +                             | +                |
| MJ0318            | 16.18                    | ATGATAAGATATTAATA     | AAACTATA <b>a</b> TTgTTAA | 297462             | -                | 25                     | +               | +                 | +                             | +                |
| MJ0319            | 11.73                    | AACAATAATTTTAAATA     | AATATA <b>a</b> CAATtAAAA | 297586             | +                | 23                     | +               | +                 | +                             | +                |
| MJ0369            | 9.05                     | CCAAATAATTATATATG     | AGTAT <b>T</b> CCCTTaCATG | 336195             | -                | 158                    | +               | +                 | +                             | +                |
| MJ0370A           | 15.81                    | ACCAATAGATTTT TATA    | AATTGA <b>A</b> TAATaATAA | 336157             | +                | 154                    | +               | +                 | +                             | +                |

|         |       |                    |                            |        |   |     |    |   |   |   |
|---------|-------|--------------------|----------------------------|--------|---|-----|----|---|---|---|
| MJ0370B | 7.72  | AGGGAATACTATATAAAA | ATTATTTGGTT <b>a</b> ATAG  | 336238 | + | 73  | +  | + | + | + |
| MJ0400  | 15.70 | AACACAAATTTTAAATA  | ATTTCTATATT <b>a</b> AAAC  | 361536 | + | 54  | ND | + | + | + |
| MJ0405A | 10.78 | TTTGAACCCTTTATATA  | AAATTGTTTAT <b>a</b> TAGA  | 365443 | - | 61  | +  | + | + | + |
| MJ0405B | 13.06 | CAAAAATTGTTTATATA  | AAGTTAAAATT <b>a</b> TTGA  | 365418 | - | 36  | +  | + | + | + |
| MJ0406  | 9.37  | CTAAAAATCTTTAAGTA  | AATTTTAACTTT <b>t</b> AAAG | 365430 | + | 128 | -  | + | + | + |
| MJ0428A | 12.76 | CACAAAATATTTTTATA  | AATTATAAAATC <b>c</b> TTAA | 385102 | - | 119 | -  | + | + | + |
| MJ0428B | 6.83  | TCCTTAAACTTTTTGTA  | AGTTTTGGAGT <b>a</b> TATA  | 385063 | - | 80  | -  | + | + | + |
| MJ0429  | 7.39  | TAGGTGAGTTATATATA  | TAAGCAATAAAA <b>a</b> TaCA | 385087 | + | 64  | -  | + | + | + |
| MJ0445A | 14.82 | ATCAACACATATATATA  | AAGTAGATATT <b>a</b> CAAA  | 399406 | - | 226 | ND | + | + | + |
| MJ0445B | 7.82  | AATCTAAGGTTTATTAA  | CACTTTATATT <b>g</b> GACA  | 399347 | - | 167 | ND | + | + | + |
| MJ0450  | 15.46 | ACTATAAGATATAAATA  | TAAAAATAATT <b>a</b> AGAA  | 403211 | + | 63  | ND | + | + | + |
| MJ0507A | 8.75  | AAAAGTATTTATATATA  | ATGGGGTTTTT <b>a</b> TATA  | 448306 | - | 38  | ND | + | + | - |
| MJ0507B | 12.39 | TATATAAAGTATTTATA  | ATATAATATCT <b>a</b> aGTT  | 448295 | - | 27  | ND | + | + | - |
| MJ0510A | 17.11 | ACCGAAAATTTTATATA  | ATCTTAGCAAT <b>a</b> TAAA  | 450696 | - | 140 | ND | + | + | - |
| MJ0510B | 12.06 | TAAGTAAAATATTTATA  | ATAATATGGAT <b>g</b> CTTT  | 450593 | - | 37  | ND | + | + | - |
| MJ0533A | 6.05  | AATATTAATTATAAGAA  | AAGATTACAAC <b>a</b> TTAA  | 469072 | - | 120 | ND | + | + | + |
| MJ0533B | 7.01  | GATTACAACATTAAATA  | AGTAATATATA <b>a</b> TAAA  | 469043 | - | 91  | ND | + | + | + |
| MJ0533C | 9.12  | GGCGATAGTAATATATA  | AATGTTAATTT <b>a</b> AGTA  | 469022 | - | 70  | ND | + | + | + |
| MJ0547  | 9.05  | ACCGAAGAGTATATATT  | ACTTTAGTGTT <b>g</b> TAAA  | 484446 | - | 39  | ND | + | + | - |
| MJ0555  | 9.36  | AACATAAATCTAAAATA  | ATACATTAACT <b>a</b> CTAT  | 490758 | + | 24  | ND | + | + | + |
| MJ0561  | 12.72 | TTAATTAACTTTAAATA  | AAAAAAATATA <b>a</b> GGTT  | 495573 | + | 30  | ND | + | + | + |
| MJ0622  | 15.46 | AAGTTAAAGTATATATA  | AAGTAAATTTT <b>g</b> TATA  | 552424 | - | 24  | ND | + | + | + |
| MJ0660  | 14.23 | ATCCATAAGTATTTATA  | AGGTTGTTATT <b>g</b> AGCG  | 586407 | - | 42  | ND | + | + | - |
| MJ0666A | 2.18  | CCACTAATTTCTTTATC  | TTATATTTTCT <b>a</b> AACT  | 592655 | - | 45  | -  | + | - | + |
| MJ0666B | 8.98  | TCTATTAATTTTTTATA  | ATATTTTCTTT <b>a</b> ATAT  | 592635 | - | 25  | -  | + | - | + |
| MJ0666C | 12.47 | TTTCTAAACTTTTATATA | TACTTCTCATT <b>g</b> GTGA  | 592619 | - | 9   | -  | + | - | + |
| MJ0667A | 4.59  | ATGAGAAGTAATATTAA  | AAGTTTAgAAA <b>a</b> TATA  | 592661 | + | 41  | +  | + | + | + |
| MJ0667B | 14.73 | TAAAGAAAATATATAAA  | AAAAATTTAAT <b>a</b> gATA  | 592676 | + | 26  | +  | + | + | + |
| MJ0673  | 12.91 | ATAGTTAAGTTTTTATA  | ATTCATTATTC <b>a</b> TAGA  | 599083 | + | 171 | +  | + | + | + |
| MJ0696  | 8.91  | CCAAAAATAATAAATC   | AATAATAACTT <b>a</b> TATG  | 622498 | - | 147 | -  | + | - | + |
| MJ0697A | 0.64  | CCATATATGCATATAAG  | TATATTGCATT <b>a</b> GATT  | 622521 | + | 25  | -  | + | + | + |
| MJ0697B | 10.60 | ATAAGTTATTATTTATA  | TATTATTTTTT <b>g</b> GTGA  | 622537 | + | 9   | +  | + | + | + |
| MJ0720  | 14.51 | AACAAAACATTTTTTATG | TTATTAATATT <b>g</b> CTaT  | 654955 | - | 28  | ND | + | + | + |

|         |       |                    |                                    |        |   |     |    |   |   |   |
|---------|-------|--------------------|------------------------------------|--------|---|-----|----|---|---|---|
| MJ0746  | 16.23 | ACCATTAATATTATATA  | TATTTTATAAT <b>g</b> TAAAT         | 672878 | - | 31  | +  | + | + | - |
| MJ0765  | 15.95 | TCAAAAATATATTTATA  | AAGATTTTAAAT <b>g</b> TAAA         | 688516 | - | 62  | ND | + | + | - |
| MJ0784  | 17.11 | ATAGATAAATTTTATATA | ACAATAATATT <b>a</b> CCAA          | 706977 | + | 38  | ND | + | + | - |
| MJ0800  | 13.27 | GCACAAAGGAATATATA  | ATGTTAGAATT <b>a</b> ATAA          | 723642 | + | 131 | ND | + | + | - |
| MJ0822  | 15.20 | ATCGTAAGATTTTATATA | AGGTATATACC <b>g</b> TCAA          | 744550 | - | 39  | +  | + | + | + |
| MJ0823  | 12.63 | GTAGAAACTTTATAAAAA | TATAATGAATT <b>a</b> GAAA          | 744794 | + | 35  | +  | + | + | + |
| MJ0825  | 13.01 | TCAGTTATGTTTATATA  | AAATTATGAAA <b>g</b> ATTT          | 747343 | - | 56  | +  | + | + | + |
| MJ0826  | 17.29 | ACGAAAAATTTTAAATA  | CATAATTAATT <b>a</b> AGCA          | 747429 | + | 32  | +  | + | - | + |
| MJ0841A | 9.18  | CAGGCAAAGTTTTAAAA  | TAAAATCCAAT <b>a</b> ATTT          | 768302 | - | 78  | -  | + | + | + |
| MJ0841B | 5.78  | GTTTTAAAATTAAAATA  | AATAATTTTT <b>g</b> GTGAA          | 768294 | - | 70  | -  | + | + | + |
| MJ0842  | 5.38  | AAAACCTGGATATATATA | TAAC TAATATC <b>g</b> AACC         | 768428 | + | 25  | +  | + | + | + |
| MJ0847  | 14.77 | ATAGAAAACCTTATATA  | AACTAAGTCTT <b>a</b> TGTA          | 773683 | + | 20  | ND | + | + | - |
| MJ0864  | 5.05  | GTTTCTAACTATATATA  | TACCTTAATGT <b>g</b> AGGT          | 788088 | - | 11  | +  | + | + | + |
| MJ0865  | 4.26  | ATACCTCATTATAAATA  | TAATTTAAAG <b>g</b> AAAT           | 788198 | + | 67  | +  | + | + | + |
| MJ0882A | 7.77  | TTAAGAACTGTTTTATT  | TATAATAAATT <b>a</b> ACTG          | 807717 | + | 61  | ND | + | - | + |
| MJ0882B | 3.43  | ATTGTATTTTTTATAAT  | AAGAATTT <b>g</b> TC <b>a</b> TAAA | 807736 | + | 42  | ND | + | - | + |
| MJ0891  | 10.05 | CGCAAAAAGAATATATT  | CAGTTTATAGT <b>g</b> AGGT          | 821616 | + | 89  | +  | + | + | + |
| MJ0923A | 13.97 | TTAAGAACTATTATATA  | AAATATTAAT <b>a</b> GTAA           | 853279 | + | 88  | -  | + | - | + |
| MJ0923B | 3.10  | TGGTTAAATATTTAAATA | TATAGTCAGAA <b>g</b> GTAA          | 853303 | + | 64  | -  | + | - | + |
| MJ0923C | 12.13 | ATAGTAACACATTTATA  | TAATAGAAAAT <b>a</b> TTTT          | 853316 | + | 51  | -  | + | - | + |
| MJ0923D | 10.84 | ATAGAAAATATTTTATA  | TAAATAAGTCC <b>a</b> ATAG          | 853347 | + | 20  | -  | + | - | + |
| MJ0936  | 10.27 | TAAAAAATTGTTATATA  | TAGATAGTGTT <b>a</b> TAAA          | 865503 | + | 41  | ND | + | + | - |
| MJ0952  | 9.08  | ACAATAAGTTTTATTAA  | TATCTCTTACT <b>a</b> TAGG          | 884415 | - | 118 | +  | + | + | + |
| MJ0953  | 13.82 | ATAGTAAGAGATATATA  | TAAAACCTTATT <b>g</b> TAAAG        | 884456 | + | 31  | -  | + | - | + |
| MJ0968  | 11.82 | CACAATAATTCTTTATA  | ATTTAATTA <b>a</b> T <b>g</b> GGGT | 901986 | + | 9   | ND | + | + | + |
| MJ0986  | 11.84 | GCAAAAACTATATATATT | AAATAACTACC <b>a</b> ATAA          | 917748 | - | 182 | -  | + | - | + |
| MJ0987  | 13.94 | AGGAAAAGATTTTATA   | ATTTTACTATC <b>a</b> GCAA          | 917767 | + | 141 | +  | + | + | + |
| MJ0990  | 11.26 | CAGATTAATTTTTTATA  | ACCTACTTTT <b>a</b> TAAA           | 919937 | - | 23  | +  | + | + | + |
| MJ0991  | 14.60 | AGAGGAAGCTATTTATA  | AATTAAGTTTT <b>a</b> TTAG          | 920151 | + | 28  | +  | + | - | + |
| MJ0999  | 16.12 | ACCGAAAGGTTTATATA  | AACATATACAT <b>a</b> CCGA          | 928545 | - | 31  | +  | + | + | + |
| MJ1018  | 7.77  | ACTATCACATATATATA  | ATCATCTATCT <b>a</b> CTGC          | 949195 | - | 70  | +  | + | + | + |
| MJ1019A | 8.04  | ACCATAAATTATAAAAT  | CTAAAAGCAGT <b>a</b> GATA          | 949196 | + | 62  | -  | + | + | + |
| MJ1019B | 8.26  | TCCAATCATATATATA   | TAGGTATTTT <b>g</b> GTGAA          | 949249 | + | 9   | +  | + | + | + |

|         |       |                     |                                     |         |   |     |    |   |   |   |
|---------|-------|---------------------|-------------------------------------|---------|---|-----|----|---|---|---|
| MJ1035A | 9.16  | TATATAACTTAAATAAA   | TATTTTTT <b>a</b> ATA <b>a</b> ACAA | 967284  | - | 116 | -  | + | + | + |
| MJ1035B | 11.30 | GTAGTAAGATATTTATT   | ATAATACTAAT <b>a</b> TCCC           | 967199  | - | 31  | +  | + | + | + |
| MJ1053  | 14.97 | TACAAAACTTTAAATA    | AAAATAGAT <b>a</b> T <b>a</b> AGGA  | 990383  | - | 35  | +  | + | + | + |
| MJ1054  | 14.64 | AACGAAAATTATAAGTA   | AATTAATTGTT <b>g</b> GAGG           | 990847  | + | 117 | +  | + | - | + |
| MJ1099  | 15.18 | AACATTAAGTTTTTATA   | TAATCATTTTT <b>g</b> AAAT           | 1040346 | - | 25  | -  | + | + | + |
| MJ1146A | 15.04 | TAAACAAATTATAAAAA   | AAGTAATTATT <b>a</b> TTAA           | 1086364 | - | 33  | +  | + | + | + |
| MJ1146B | 8.12  | TTATAAAAAATATATATT  | TATTATTAATC <b>c</b> TACA           | 1086357 | - | 26  | +  | + | + | + |
| MJ1158  | 14.68 | TTAAAAAATAATATATA   | TAAATTTTTT <b>a</b> TGTA            | 1097639 | - | 41  | -  | + | + | + |
| MJ1185  | 12.79 | AACAAAATCTATAAAAT   | AAATAAAAATT <b>a</b> ACAT           | 1125066 | - | 37  | +  | + | + | + |
| MJ1186  | 9.14  | AATATAATATTTAAATA   | CTTTACTTTTT <b>g</b> AAAA           | 1125163 | + | 28  | -  | + | - | + |
| MJ1225  | 12.75 | AGGATAATCATTTTATA   | ATATTAATATT <b>a</b> TGTG           | 1167042 | + | 58  | +  | + | + | + |
| MJ1228  | 14.47 | ATAGTAATATTTATATA   | TAGTTATTA <b>a</b> AGTTT            | 1171550 | - | 33  | ND | + | + | - |
| MJ1246  | 11.39 | AACGACACATATAAAAA   | ATATAAATTTT <b>a</b> CGGT           | 1189802 | - | 30  | ND | + | + | + |
| MJ1249  | 9.12  | TTGAGAAGTTAAATATA   | AAATCTAAAAC <b>a</b> ATAA           | 1191345 | + | 19  | +  | + | + | + |
| MJ1259  | 16.21 | GCAAAAAACTATAAATA   | TTGATATTAAT <b>a</b> ACTC           | 1201107 | + | 31  | ND | + | + | - |
| MJ1260  | 13.38 | ACCAAAAATTATTTAAA   | CAATAATTATC <b>c</b> TGGC           | 1202056 | + | 227 | ND | + | + | - |
| MJ1265  | 10.72 | ATCAAAAAGCTTTAAAG   | TAATAGTAATT <b>a</b> TATA           | 1210366 | - | 25  | +  | + | + | + |
| MJ1266  | 16.91 | CTCGAAAATTTTAAATA   | AAAATGAAATT <b>g</b> CCAT           | 1210494 | + | 73  | +  | + | + | + |
| MJ1311  | 4.04  | AACCAAAAAGCTAAAAG   | AAATATTAATT <b>t</b> GAAG           | 1256405 | + | 47  | ND | + | + | + |
| MJ1333  | 11.75 | GTGTTAAAATATTTATA   | TAATGATATT <b>t</b> AAAAT           | 1282486 | + | 24  | +  | + | + | + |
| MJ1334  | 11.74 | TCACCAAATTATTTATA   | ACTATATAATT <b>g</b> TAAC           | 1284162 | - | 42  | +  | + | + | + |
| MJ1335  | 9.28  | TATGTTACAATTATATA   | TAGGTATAAAT <b>a</b> ATTT           | 1284195 | + | 140 | -  | + | - | + |
| MJ1338  | 15.40 | ATAATAAAGTATTTATA   | AAACTCTAAAT <b>g</b> CGTA           | 1286293 | + | 31  | ND | + | + | - |
| MJ1403  | 13.57 | ATCGTAAGATTTTATATA  | ATATACTGCAT <b>a</b> AGTA           | 1365854 | - | 116 | +  | + | + | + |
| MJ1404  | 13.09 | CTGTTAAACTTTTAAATA  | TAATATCAATC <b>a</b> TCAA           | 1366077 | + | 29  | +  | + | + | + |
| MJ1486  | 8.70  | ACAAAAAATATATTAA    | AAAGCTAAAGT <b>a</b> TAGA           | 1458931 | - | 42  | -  | + | + | + |
| MJ1534  | 5.12  | AATAGAAAACCTTAATTA  | ATATAATAATT <b>g</b> TGT            | 1511775 | + | 31  | +  | + | + | + |
| MJ1543  | 6.20  | ACCGAAAACCTTAAAT    | CTAATAAAGGT <b>a</b> GCgA           | 1521373 | + | 39  | ND | + | + | + |
| MJ1585  | 15.50 | ATAGGAAATTATTAATA   | TAACTATTTTT <b>g</b> TAGT           | 1559201 | - | 35  | +  | + | + | + |
| MJ1586  | 10.36 | CCCACAATAAATATATG   | AAAATAGTTAT <b>g</b> TGAG           | 1559214 | + | 39  | +  | + | + | + |
| MJ1592  | 11.77 | ACTATAAATTTTTTATA   | GTATAAAGATT <b>a</b> AAAA           | 1564540 | + | 57  | ND | + | + | - |
| MJ1597A | 15.03 | CCAAAACTTTTTTATA    | AAAACATTTT <b>G</b> aGTA            | 1568422 | + | 178 | ND | + | + | + |
| MJ1597B | 6.27  | AAAGATATTTTTTAAAGTA | ATTTATTGTTT <b>c</b> TaTT           | 1568566 | + | 34  | ND | + | + | + |

|         |       |                   |                           |         |    |     |    |    |   |   |
|---------|-------|-------------------|---------------------------|---------|----|-----|----|----|---|---|
| MJ1619  | 12.94 | CACTTAACCCATAAATA | AAATATTATTT <b>a</b> GGAT | 1594518 | -  | 29  | ND | +  | + | + |
| MJ1636  | 9.36  | AACGGAAAATATTTTAA | AAATATCTATA <b>a</b> TTGA | 1617181 | +  | 54  | ND | +  | + | - |
| MJ0722* | 8.17  | TTAATAATATTAATATA | TATAGTTCaTT <b>g</b> CAAA | 656690  | -  | 138 | +  | ND | - | + |
| MJ0723* | 13.07 | TCCAAAATTTTTATATA | TATAGTTCaTT <b>g</b> CAAA | 656604  | +  | 147 | +  | ND | - | + |
| MJ0740* | 9.34  | GTGATTAATGATATATA | AGATAAATAAT <b>g</b> ACAA | 668883  | -  | 27  | +  | ND | + | - |
| MJ0210  | NA    | NA                | processing site           | NA      | NA | NA  | -  | -  | + | + |
| MJ0387  | NA    | NA                | processing site           | NA      | NA | NA  | ND | -  | + | - |
| MJ0499  | NA    | NA                | processing site           | NA      | NA | NA  | ND | -  | + | + |
| MJ0006  | NA    | NA                | NA                        | NA      | NA | NA  | -  | -  | + | + |
| MJ0135  | NA    | NA                | NA                        | NA      | NA | NA  | -  | -  | - | + |
| MJ0150  | NA    | NA                | NA                        | NA      | NA | NA  | ND | -  | + | + |
| MJ0209  | NA    | NA                | NA                        | NA      | NA | NA  | -  | -  | + | + |
| MJ0537  | NA    | NA                | NA                        | NA      | NA | NA  | ND | -  | + | - |
| MJ0672  | NA    | NA                | NA                        | NA      | NA | NA  | -  | -  | - | + |
| MJ0676  | NA    | NA                | NA                        | NA      | NA | NA  | ND | -  | + | - |
| MJ0721  | NA    | NA                | NA                        | NA      | NA | NA  | ND | -  | + | + |
| MJ0732  | NA    | NA                | NA                        | NA      | NA | NA  | ND | -  | + | - |
| MJ0890  | NA    | NA                | NA                        | NA      | NA | NA  | -  | -  | - | + |
| MJ0922  | NA    | NA                | NA                        | NA      | NA | NA  | -  | -  | - | + |
| MJ1000  | NA    | NA                | NA                        | NA      | NA | NA  | -  | -  | + | + |
| MJ1036  | NA    | NA                | NA                        | NA      | NA | NA  | -  | -  | - | + |
| MJ1100  | NA    | NA                | NA                        | NA      | NA | NA  | -  | -  | + | + |
| MJ1147  | NA    | NA                | NA                        | NA      | NA | NA  | -  | -  | - | + |
| MJ1157  | NA    | NA                | NA                        | NA      | NA | NA  | -  | -  | - | + |
| MJ1197  | NA    | NA                | NA                        | NA      | NA | NA  | -  | -  | + | + |
| MJ1224  | NA    | NA                | NA                        | NA      | NA | NA  | -  | -  | - | + |
| MJ1248  | NA    | NA                | NA                        | NA      | NA | NA  | -  | -  | - | + |
| MJ1332  | NA    | NA                | NA                        | NA      | NA | NA  | -  | -  | + | + |
| MJ1423  | NA    | NA                | NA                        | NA      | NA | NA  | -  | -  | + | + |
| MJ1424  | NA    | NA                | NA                        | NA      | NA | NA  | -  | -  | + | + |
| MJ1533  | NA    | NA                | NA                        | NA      | NA | NA  | -  | -  | + | + |
| MJ1555  | NA    | NA                | NA                        | NA      | NA | NA  | ND | -  | + | - |
| MJ1656  | NA    | NA                | NA                        | NA      | NA | NA  | ND | -  | + | - |

<sup>a</sup>Suffix A, B, C, or D was used when more than one promoter was identified for a gene; \*, TSS previously determined (1).

<sup>b</sup>Promoter score calculated as the sum of the scores of all the promoter elements (BRE, TATA box, PPE, and Inr) and a spacer penalty score applied for suboptimal spacing between the TATA box and the TSS.

<sup>c</sup>Lower case bold, major start site; lower case but not bold, alternative start site; NA, not available.

<sup>d</sup>Coordinate of the major TSS in the chromosome of *M. jannaschii* (NCBI accession no. NC\_000909.1).

<sup>e</sup>Direction of transcription: +, transcription toward a larger genomic coordinate; -, transcription toward a smaller genomic coordinate.

<sup>f</sup>Distance from the major TSS to the start of the nearest downstream gene (translation start locations from David E. Graham, University of Texas).

<sup>g</sup>Primer extension: +, TSS mapped; -, experiment done but TSS not observed; ND, experiment not done.

<sup>h</sup>Rapid amplification of 5' cDNA ends: +, TSS mapped; -, experiment done but TSS not observed; ND, experiment not done.

<sup>i</sup>+, protein product detected by proteomics (2); -, protein product not detected.

<sup>j</sup>+, divergent gene; -, not divergent gene.

## REFERENCES

1. Ouhammouch, M., Dewhurst, R.E., Hausner, W., Thomm, M. and Geiduschek, E.P. (2003) Activation of archaeal transcription by recruitment of the TATA-binding protein. *Proc. Natl. Acad. Sci. USA*, **100**, 5097-5102.
2. Zhu, W., Reich, C.I., Olsen, G.J., Giometti, C.S. and Yates, J.R., 3rd. (2004) Shotgun proteomics of *Methanococcus jannaschii* and insights into methanogenesis. *J. Proteome Res.*, **3**, 538-548.
