# Supplementary material for: Protein-coding gene promoters in Methanocaldococcus (Methanococcus) jannaschii
Source: PubMed Central journal article supplement — Nucleic Acids Res. 2009 Apr 9;37(11):3588–601. doi: 10.1093/nar/gkp213 (PMC2699501; doi:10.1093/nar/gkp213), 2009-04-09
Supplement: gkp213_3.pdf [file gkp213_3.pdf]

**Table S3.** Chi-square test of comparison between nucleotide frequencies observed at corresponding positions in the protein promoters (this study) and the *in vitro* selected promoters (1)

| Position <sup>a</sup> | Chi-square test <i>p</i> value |
|-----------------------|--------------------------------|
| -50                   | 0.05175                        |
| -49                   | 0.82246                        |
| -48                   | 0.08679                        |
| -47                   | 0.93680                        |
| -46                   | 0.38310                        |
| -45                   | 0.65923                        |
| -44                   | 0.73333                        |
| <b>-43</b>            | <b>0.02085</b>                 |
| -42                   | 0.32817                        |
| -41                   | 0.44631                        |
| -40                   | 0.17808                        |
| -39                   | 0.14081                        |
| -38                   | 0.14136                        |
| <b>-37</b>            | <b>0.00022</b>                 |
| <b>-36</b>            | <b>0.04585</b>                 |
| <b>-35</b>            | <b>0.01631</b>                 |
| -34                   | 0.60460                        |
| -33                   | 0.07074                        |
| <b>-32</b>            | <b>0.00005</b>                 |
| -31                   | 0.19297                        |
| -30                   | 0.09153                        |
| -29                   | 0.10896                        |
| <b>-28</b>            | <b>0.03292</b>                 |
| <b>-27</b>            | <b>0.00324</b>                 |
| -26                   | 0.11668                        |
| -25                   | 0.26751                        |
| <b>-24</b>            | <b>0.02012</b>                 |
| -23                   | 0.41809                        |
| -22                   | 0.21196                        |
| -21                   | 0.78206                        |
| <b>-20</b>            | <b>0.03024</b>                 |
| -19                   | 0.62309                        |
| -18                   | 0.59914                        |
| -17                   | 0.34266                        |
| -16                   | 0.99755                        |

<sup>a</sup>Positions with a *p* value of less than 0.05 are shown in bold.

## REFERENCES

1. Li,E., Reich,C.I. and Olsen,G.J. (2008) A whole-genome approach to identifying protein binding sites: promoters in *Methanocaldococcus* (*Methanococcus*) *jannaschii*. *Nucleic Acids Res.*, **36**, 6948–6958.
