# Supplementary material for: Protein-coding gene promoters in Methanocaldococcus (Methanococcus) jannaschii
Source: PubMed Central journal article supplement — Nucleic Acids Res. 2009 Apr 9;37(11):3588–601. doi: 10.1093/nar/gkp213 (PMC2699501; doi:10.1093/nar/gkp213), 2009-04-09
Supplement: gkp213_4.pdf [file gkp213_4.pdf]

**Table S4.** Relative binding affinities of promoters for TBP and TFBc

| Gene                                   | Promoter sequence<br>(BRE/TATA box) | BRE/TATA box<br>score (bit) | Relative<br>binding affinity <sup>a</sup> |
|----------------------------------------|-------------------------------------|-----------------------------|-------------------------------------------|
| MJ0842                                 | AAAACCTGGATATATATA                  | 5.58                        | 0.025                                     |
| MJ0319                                 | AACAATAATTTTAAATA                   | 11.88                       | 0.026                                     |
| MJ1265                                 | ATCAAAAAGCTTTAAAG                   | 5.34                        | 0.046                                     |
| MJ0822                                 | ATCGTAAGATTTTATATA                  | 14.53                       | 0.050                                     |
| MJ1534                                 | AATAGAAAACCTTAATTA                  | 3.08                        | 0.062                                     |
| MJ1266                                 | CTCGAAAAATTTAAATA                   | 13.32                       | 0.096                                     |
| MJ0891                                 | CGCAAAAAGAATATATT                   | 7.19                        | 0.105                                     |
| MJ0746                                 | ACCATTAATATTATATA                   | 11.20                       | 0.153                                     |
| MJ1404                                 | CTGTTAAACTTTAAATA                   | 9.59                        | 0.162                                     |
| MJ0318                                 | ATGATAAGATATTAATA                   | 10.58                       | 0.268                                     |
| MJ1053                                 | TACAAAAACTTTAAATA                   | 12.80                       | 0.280                                     |
| MJ1054                                 | AACGAAAATTATAAGTA                   | 10.45                       | 0.411                                     |
| tRNA <sup>Cys</sup> (GCA) <sup>b</sup> | ACCATAAAATTTTATATA                  | 15.39                       | 0.345                                     |
| tRNA <sup>Leu</sup> (GAG) <sup>b</sup> | GCGTAAGTTTTTATATA                   | 12.23                       | 0.521                                     |
| tRNA <sup>Met</sup> (CAT) <sup>b</sup> | GCCGAAAAGTATATATA                   | 14.56                       | 0.521                                     |
| tRNA <sup>Ser</sup> (GCT) <sup>b</sup> | AACGAAAACCTATATATA                  | 15.30                       | 0.563                                     |
| tRNA <sup>Val</sup> (TAC) <sup>b</sup> | AGCATAAACTTTTATATA                  | 13.90                       | 0.876                                     |
| tRNA <sup>Ser</sup> (TGA) <sup>b</sup> | ACCGTAAAATTTTATATA                  | 15.79                       | 0.890                                     |
| tRNA <sup>Arg</sup> (TCT) <sup>b</sup> | AACGAAAAGTATATATA                   | 14.98                       | 1.010                                     |
| tRNA <sup>Thr</sup> (TGT) <sup>b</sup> | ACCGAAAAGTTTTATATA                  | 16.11                       | 1.070                                     |
| tRNA <sup>Ile</sup> (GAT) <sup>b</sup> | ACCGAAAAGTATATATA                   | 15.96                       | 1.465                                     |
| tRNA <sup>Ala</sup> (GGC) <sup>b</sup> | ATAGAAAAGTTTTATATA                  | 14.35                       | 1.494                                     |
| tRNA <sup>Lys</sup> (TTT) <sup>b</sup> | ACCGAAAAGTATATATA                   | 15.96                       | 1.591                                     |
| tRNA <sup>Ser</sup> (GGA) <sup>b</sup> | ACCGAAAATAATATATA                   | 13.48                       | 1.673                                     |
| tRNA <sup>Phe</sup> (GAA) <sup>b</sup> | ACCGAAAAGTTTTATATA                  | 16.11                       | 1.679                                     |
| tRNA <sup>Val</sup> (GAC) <sup>b</sup> | ACCGAAAAGTTTTATATA                  | 16.11                       | 1.684                                     |
| tRNA <sup>Gly</sup> (GCC) <sup>b</sup> | ACCGAAAAGTATTTATA                   | 14.83                       | 1.765                                     |
| tRNA <sup>Leu</sup> (TAA) <sup>b</sup> | ACCGAAAAGTATATATA                   | 15.96                       | 2.964                                     |
| tRNA <sup>Val</sup> (CAC) <sup>c</sup> | ACCATAAAAATTTTATA                   | 11.69                       | 0.064                                     |
| tRNA <sup>Arg</sup> (GCG) <sup>c</sup> | AACAAAAACTAAAATTA                   | 5.32                        | 0.069                                     |
| tRNA <sup>Trp</sup> (CCA) <sup>c</sup> | ACCGTAAAATTTTATATA                  | 15.79                       | 0.512                                     |

<sup>a</sup>Data of the tRNA promoters from (1).<sup>b</sup>Identified by the *in vitro* selection (2).<sup>c</sup>Identified computationally (1).

## REFERENCES

1. Li,E. (2007) Non-coding genomics of *Methanocaldococcus jannaschii*: a survey of promoters, non-coding RNA genes, and repetitive DNA elements. *Ph.D. Dissertation*. University of Illinois, Urbana, IL.
2. Li,E., Reich,C.I. and Olsen,G.J. (2008) A whole-genome approach to identifying protein binding sites: promoters in *Methanocaldococcus (Methanococcus) jannaschii*. *Nucleic Acids Res.*, **36**, 6948–6958.
