# Supplementary material for: Protein-coding gene promoters in Methanocaldococcus (Methanococcus) jannaschii
Source: PubMed Central journal article supplement — Nucleic Acids Res. 2009 Apr 9;37(11):3588–601. doi: 10.1093/nar/gkp213 (PMC2699501; doi:10.1093/nar/gkp213), 2009-04-09
Supplement: gkp213_5.pdf [file gkp213_5.pdf]

**Table S5.** Relative *in vitro* transcriptional activities and BRE/TATA box scores of the *M. vannielii* tRNA<sup>Val</sup> promoter and mutants from it

| Plasmid   | Mutation <sup>a</sup>        | BRE/TATA box score (bit) <sup>b</sup> | Relative transcriptional activity (%) <sup>c</sup> |
|-----------|------------------------------|---------------------------------------|----------------------------------------------------|
| pIC 31/30 | AAAAGTTTATATATCATGA          | 12.76                                 | 100                                                |
| pIC 31/31 | AAAAG <b>G</b> TTATATATCATGA | 9.83                                  | 58 ± 4                                             |
| pIC 31/32 | AAAAGT <b>G</b> TATATATCATGA | 5.10                                  | 13 ± 5                                             |
| pIC 31/33 | AAAAGTT <b>G</b> ATATATCATGA | 4.23                                  | 21 ± 6                                             |
| pIC 31/34 | AAAAGTTTATA <b>G</b> ATCATGA | 4.42                                  | 1 ± 1                                              |
| pIC 31/35 | AAAAG <b>GG</b> TATATATCATGA | 2.17                                  | 3 ± 2                                              |
| pIC 31/43 | AAAAGTTT <b>G</b> TATATCATGA | 4.69                                  | 10 ± 5                                             |
| pIC 31/44 | AAAAGTTT <b>A</b> GATATCATGA | 4.67                                  | 3 ± 2                                              |
| pIC 31/45 | AAAAGTTTAT <b>G</b> TATCATGA | 9.31                                  | 16 ± 3                                             |
| pIC 31/46 | AAAAGTTTATAT <b>G</b> TCATGA | 10.29                                 | 39 ± 4                                             |
| pIC 31/47 | AAAAGTTTATAT <b>A</b> GCATGA | 12.76                                 | 105 ± 11                                           |
| pIC 31/48 | AAAAGTTTATATATC <b>G</b> TGA | 12.76                                 | 95 ± 30                                            |
| pIC 31/49 | AAAAGTTTATATATCAT <b>G</b>   | 12.76                                 | 115 ± 54                                           |
| pIC 31/50 | AAAA <b>T</b> TTTATATATCATGA | 12.86                                 | 94 ± 26                                            |
| pIC 31/51 | AA <b>G</b> AGTTTATATATCATGA | 8.61                                  | 45 ± 13                                            |

<sup>a</sup>Mutations are shown in bold and are underlined.

<sup>b</sup>Calculated using the PWMs of the BRE and the TATA box of the identified protein promoters of *M. jannaschii*.

<sup>c</sup>Data from (1).

## REFERENCES

1. Hausner, W., Frey, G. and Thomm, M. (1991) Control regions of an archaeal gene. A TATA box and an initiator element promote cell-free transcription of the tRNA<sup>Val</sup> gene of *Methanococcus vannielii*. *J. Mol. Biol.*, **222**, 495-508.
