# Supplementary material for: Protein-coding gene promoters in Methanocaldococcus (Methanococcus) jannaschii
Source: PubMed Central journal article supplement — Nucleic Acids Res. 2009 Apr 9;37(11):3588–601. doi: 10.1093/nar/gkp213 (PMC2699501; doi:10.1093/nar/gkp213), 2009-04-09
Supplement: gkp213_6.pdf [file gkp213_6.pdf]

**Table S6.** Ribosome binding sites (RBS) in the 5'-untranslated regions (5'-UTR)

| Transcript    | RBS in 5'-UTR <sup>a</sup>         | Coordinates <sup>b</sup> | Dir <sup>c</sup> |
|---------------|------------------------------------|--------------------------|------------------|
| 16S rRNA      |                                    | 157985–                  |                  |
| 3' complement | <b><u>GGAGGUGA</u></b>             | 157992                   | +                |
|               |                                    | 62 nt- 8875–             |                  |
| MJ0007        | AUAUAAA <u>UUUGGUGA</u> UAUGAUG    | 8882                     | +                |
|               |                                    | 32 nt- 37282–            |                  |
| MJ0035        | UAUAAUUUU <u>GGUGA</u> GUAUCAUG    | 37275                    | –                |
|               |                                    | 34 nt- 65875–            |                  |
| MJ0068        | UUGGUA <u>GUUGGUGA</u> GAUAAGAUG   | 65868                    | –                |
|               |                                    | 4 nt- 89494–             |                  |
| MJ0094        | AAUAAACUU <u>GGUGA</u> UUCUAAUG    | 89487                    | –                |
|               |                                    | 18 nt- 111527–           |                  |
| MJ0113        | AUGACAGAU <u>UUGGGUGA</u> GGUUAUG  | 111520                   | –                |
|               |                                    | 115 nt- 131454–          |                  |
| MJ0136A       | ACUAUAAUU <u>AGGUGA</u> AAUAAAUG   | 131461                   | +                |
|               |                                    | 92 nt- 131454–           |                  |
| MJ0136B       | ACUAUAAUU <u>AGGUGA</u> AAUAAAUG   | 131461                   | +                |
|               |                                    | 306 nt- 165172–          |                  |
| MJ0161A       | AAAAAGGAUU <u>GGUGA</u> AUAUAAUG   | 165165                   | –                |
|               |                                    | 21 nt- 165172–           |                  |
| MJ0161B       | AAAAAGGAUU <u>GGUGA</u> AUAUAAUG   | 165165                   | –                |
|               |                                    | 4 nt- 171022–            |                  |
| MJ0168        | AUCUAUUG <u>UGAGGUGG</u> UAUUAUG   | 171015                   | –                |
|               |                                    | 266 nt- 178408–          |                  |
| MJ0176        | AAUAUGC <u>UGGAGGUUA</u> GAUUAUG   | 178415                   | +                |
|               |                                    | 16 nt- 192369–           |                  |
| MJ0199        | ACAUUUUA <u>GAGGUGG</u> UAAUAAUG   | 192376                   | +                |
|               |                                    | 68 nt- 193564–           |                  |
| MJ0202        | UUAAAUUU <u>CAUGGUGA</u> GAGUGUG   | 193571                   | +                |
|               |                                    | 25 nt- 198462–           |                  |
| MJ0205        | AAUUGUCUAA <u>AGGUGA</u> AAAGAUG   | 198455                   | –                |
|               |                                    | 139 nt- 208960–          |                  |
| MJ0217        | UGAAAAGA <u>GAGGUUG</u> GAGAAUAAUG | 208953                   | –                |
|               |                                    | 214483–                  |                  |
| MJ0223        | AAUAACU <u>GCAGGUGG</u> AAGUAUG    | 214476                   | –                |
|               |                                    | 27 nt- 215080–           |                  |
| MJ0224A       | AUUUCCUCC <u>UGAGGUAA</u> AGUAUG   | 215073                   | –                |
|               |                                    | 21 nt- 215080–           |                  |
| MJ0224B       | AUUUCCUCC <u>UGAGGUAA</u> AGUAUG   | 215073                   | –                |
|               |                                    | 8 nt- 255910–            |                  |
| MJ0269        | UGACAGUUUA <u>AGGUGA</u> GUGUAUG   | 255903                   | –                |
|               |                                    | 21 nt- 282928–           |                  |
| MJ0299        | CAAAAAACAG <u>GGUGA</u> GCAGAAUG   | 282921                   | –                |
|               |                                    | 10 nt- 288292–           |                  |
| MJ0307        | GAGGUUUUA <u>AGGUGU</u> UAGUAUG    | 288285                   | –                |

|         |                                  |                   |                   |   |
|---------|----------------------------------|-------------------|-------------------|---|
| MJ0313  | AAUAAAUA <u>AGGUGA</u> UGUAGAGUG | 35 nt-<br>293442  | 293449-<br>293442 | - |
| MJ0318  | AAUCUAAAU <u>GGAGGGAA</u> ACUAUG | 5 nt-<br>297448   | 297448-<br>297441 | - |
| MJ0369  | AAAUUACU <u>UGGUGA</u> GGGUGAAUG | 138 nt-<br>336051 | 336051-<br>336044 | - |
| MJ0370A | AAUAAUAC <u>GGAGGUC</u> AUAACGUG | 134 nt-<br>336299 | 336299-<br>336306 | + |
| MJ0370B | AAUAAUAC <u>GGAGGUC</u> AUAACGUG | 53 nt-<br>336306  | 336299-<br>336306 | + |
| MJ0405A | AAGAUUUUU <u>AGGUGA</u> AAAUUAUG | 41 nt-<br>365388  | 365395-<br>365388 | - |
| MJ0405B | AAGAUUUUU <u>AGGUGA</u> AAAUUAUG | 16 nt-<br>365388  | 365395-<br>365388 | - |
| MJ0445A | AAUAAAAAA <u>AGGUGA</u> UAAAUG   | 206 nt-<br>399185 | 399192-<br>399185 | - |
| MJ0445B | AAUAAAAAA <u>AGGUGA</u> UAAAUG   | 147 nt-<br>399185 | 399192-<br>399185 | - |
| MJ0507A | UUGUUAAAU <u>AGGUGA</u> AAAUCAUG | 18 nt-<br>448281  | 448281-<br>448274 | - |
| MJ0507B | UUGUUAAAU <u>AGGUGA</u> AAAUCAUG | 7 nt-<br>448281   | 448281-<br>448274 | - |
| MJ0510A | AAAAAGAAA <u>GGAGGA</u> UGACUAUG | 120 nt-<br>450567 | 450567-<br>450560 | - |
| MJ0510B | AAAAAGAAA <u>GGAGGA</u> UGACUAUG | 17 nt-<br>450567  | 450567-<br>450560 | - |
| MJ0547  | AUUUUAGAA <u>UGGUGA</u> CAUUAUG  | 19 nt-<br>484420  | 484420-<br>484413 | - |
| MJ0555  | UUUAAAAA <u>AGGUGA</u> GAGAUUAUG | 4 nt-<br>490768   | 490768-<br>490775 | + |
| MJ0561  | CAGUGAAAA <u>AGGUGG</u> UUUUUAUG | 10 nt-<br>495590  | 495590-<br>495597 | + |
| MJ0660  | AAAUAAA <u>UUUGGUGA</u> AUUGAAUG | 22 nt-<br>586378  | 586378-<br>586371 | - |
| MJ0666A | UACUUCUCA <u>UUGGUGA</u> AAACAUG | 25 nt-<br>592622  | 592622-<br>592615 | - |
| MJ0666B | UACUUCUCA <u>UUGGUGA</u> AAACAUG | 5 nt-<br>592622   | 592622-<br>592615 | - |
| MJ0666C | <u>GGUGA</u> AAACAUG             | 592619-<br>592615 | 592619-<br>592615 | - |
| MJ0667A | AGAAAUU <u>AGUGGUGA</u> UUUAAAUG | 21 nt-<br>592689  | 592689-<br>592696 | + |
| MJ0667B | AGAAAUU <u>AGUGGUGA</u> UUUAAAUG | 6 nt-<br>592689   | 592689-<br>592696 | + |
| MJ0673  | CAAUUAUU <u>ACAGGUGU</u> UAAUAUG | 151 nt-<br>599242 | 599242-<br>599249 | + |

|         |                                   |                              |   |
|---------|-----------------------------------|------------------------------|---|
| MJ0697A | UAUUAUUUUUU <u>GGUGA</u> UAAAAUG  | 5 nt-<br>622534-<br>622541   | + |
| MJ0697B | <u>GGUGA</u> UAAAAUG              | 622537-<br>622541            | + |
| MJ0720  | UAAUCUUUUU <u>GGUGA</u> UAAGUAUG  | 8 nt-<br>654940-<br>654933   | - |
| MJ0722  | AAAAAUUUU <u>GGAGGA</u> AAGAAAUG  | 118 nt-<br>656563-<br>656556 | - |
| MJ0723  | AUCCGAAA <u>UUCGGUGA</u> UAUUAUG  | 127 nt-<br>656739-<br>656746 | + |
| MJ0740  | AUAGCACAA <u>AGGUGA</u> UAGAAAUG  | 7 nt-<br>668869-<br>668862   | - |
| MJ0746  | AAAGUUA <u>AAAAGGUGA</u> AAGCAUG  | 11 nt-<br>672859-<br>672852  | - |
| MJ0765  | AAAAGUCU <u>UAGGGUGA</u> AAUUAUG  | 42 nt-<br>688466-<br>688459  | - |
| MJ0784  | AUUAACAA <u>AAAAGGUGA</u> GAGGAUG | 18 nt-<br>707003-<br>707010  | + |
| MJ0800  | UAUUAAA <u>UUGGGUGA</u> AGUUAUG   | 111 nt-<br>723760-<br>723767 | + |
| MJ0822  | AAAACU <u>UAGGUGA</u> UAAAGUAUG   | 19 nt-<br>744525-<br>744518  | - |
| MJ0825  | AAUUAAU <u>AGAGGUGG</u> AAGAUAUG  | 36 nt-<br>747300-<br>747293  | - |
| MJ0847  | AUGUAAA <u>UAGAGGUGA</u> UAGGAUG  | 773691-<br>773698            | + |
| MJ0864  | <u>GAGGUGA</u> UACUAUG            | 788088-<br>788082            | - |
| MJ0882A | AAUAAGAG <u>CACGGUGA</u> UAGAAUG  | 41 nt-<br>807766-<br>807773  | + |
| MJ0882B | AAUAAGAG <u>CACGGUGA</u> UAGAAUG  | 22 nt-<br>807766-<br>807773  | + |
| MJ0891  | AUAUACU <u>CAGGUGA</u> UAUGAGAUG  | 69 nt-<br>821691-<br>821698  | + |
| MJ0986  | GUGUUU <u>UAGGUGA</u> GUACAUUAUG  | 162 nt-<br>917581-<br>917574 | - |
| MJ0987  | CUUAACU <u>UAGAGGUGA</u> CUGUUAUG | 121 nt-<br>917895-<br>917902 | + |
| MJ0990  | AAAUCUCA <u>UAGGUGA</u> UAGCUAUG  | 3 nt-<br>919927-<br>919920   | - |
| MJ0999  | UAACAAUC <u>UAGAGGUGA</u> GAAGAUG | 11 nt-<br>928526-<br>928519  | - |
| MJ1018  | UGAUGAAA <u>UAGGUGA</u> AUAGACAUG | 50 nt-<br>949139-<br>949132  | - |
| MJ1019A | UAGGUAAUUU <u>GGUGA</u> AAUUAUG   | 42 nt-<br>949245-<br>949252  | + |

|         |                                         |                     |         |   |
|---------|-----------------------------------------|---------------------|---------|---|
| MJ1035A | GUAAUAAAA <b><u>AGGUGA</u></b> UAACUUG  | 96 nt-<br>967180-   | 967173  | - |
| MJ1035B | GUAAUAAAA <b><u>AGGUGA</u></b> UAACUUG  | 11 nt-<br>967180-   | 967173  | - |
| MJ1146A | AAAUUUCAAA <b><u>GGUGA</u></b> AUCUAUG  | 13 nt-<br>1086343-  | 1086336 | - |
| MJ1146B | AAAUUUCAAA <b><u>GGUGA</u></b> AUCUAUG  | 6 nt-<br>1086343-   | 1086336 | - |
| MJ1158  | UCCAACAUUUU <b><u>GGUGA</u></b> UUUUAUG | 21 nt-<br>1097610-  | 1097603 | - |
| MJ1186  | AUUAAAA <b><u>AGGUGA</u></b> AUAUAGAUG  | 8 nt-<br>1125177-   | 1125184 | + |
| MJ1228  | GAAAAUAAA <b><u>AGGUGA</u></b> UAAUAAUG | 13 nt-<br>1171530-  | 1171523 | - |
| MJ1249  | AAUAACUU <b><u>AGGGUGA</u></b> AACUAUG  | 1191352-            | 1191359 | + |
| MJ1259  | AGGAUGGG <b><u>GUUGGUGA</u></b> GAAGAUG | 11 nt-<br>1201126-  | 1201133 | + |
| MJ1260  | UAAAAUA <b><u>GGAGGGAA</u></b> UACUAUG  | 207 nt-<br>1202271- | 1202278 | + |
| MJ1333  | UUACACAAU <b><u>AGGUGA</u></b> AAUGAAUG | 4 nt-<br>1282497-   | 1282504 | + |
| MJ1403  | GAAGUAGU <b><u>AGAGGUGG</u></b> GAAGAUG | 96 nt-<br>1365750-  | 1365743 | - |
| MJ1404  | UCUGUAAA <b><u>AGGUGA</u></b> GAUUAAUG  | 9 nt-<br>1366093-   | 1366100 | + |
| MJ1486  | AAAAUUUU <b><u>GGUGA</u></b> AAUUUAUG   | 22 nt-<br>1458902-  | 1458895 | - |
| MJ1534  | ACAAAUU <b><u>GAGGGUGA</u></b> GAUUGUG  | 11 nt-<br>1511794-  | 1511801 | + |
| MJ1543  | GAGUCUUUA <b><u>UGGUGA</u></b> UAGAAAUG | 19 nt-<br>1521399-  | 1521406 | + |
| MJ1586  | AUUUCCUAUU <b><u>GGUGAG</u></b> GAGAAUG | 19 nt-<br>1559241-  | 1559248 | + |
| MJ1592  | GUUAUAGCUA <b><u>AGGUGA</u></b> AAGUAUG | 37 nt-<br>1564585-  | 1564592 | + |
| MJ1636  | CAUGUCCAU <b><u>UGGUGA</u></b> UAAGAUG  | 34 nt-<br>1617223-  | 1617230 | + |

<sup>a</sup>The first data row shows the sequence (5'→3') of eight nucleotides complementary to the 3' end of the 16S rRNA. The following rows show the sequences (5'→3') of the 5'-UTRs including the translation start codons (bold). The RBSs are shaded, and the nucleotides that match the 16S rRNA 3' end complement are shown in bold and are underlined. In this study, an RBS is defined as a sequence that has at least 5 consecutive matches to the 16S rRNA 3' end complement, and has a spacing of 3 to 7 nucleotides between the 3' edge of the sequence and the 5' edge of the translation start codon.

<sup>b</sup>Coordinates of RBSs (shaded) in the chromosome of *M. jannaschii* (NCBI accession no. NC\_000909.1).

<sup>c</sup>Direction of RBS. +, from a smaller genomic coordinate to a larger genomic coordinate; -, from a larger genomic coordinate to a smaller genomic coordinate.
