# Supplementary material for: Protein-coding gene promoters in Methanocaldococcus (Methanococcus) jannaschii
Source: PubMed Central journal article supplement — Nucleic Acids Res. 2009 Apr 9;37(11):3588–601. doi: 10.1093/nar/gkp213 (PMC2699501; doi:10.1093/nar/gkp213), 2009-04-09
Supplement: gkp213_7.pdf [file gkp213_7.pdf]

A

MJ0007  
A G C T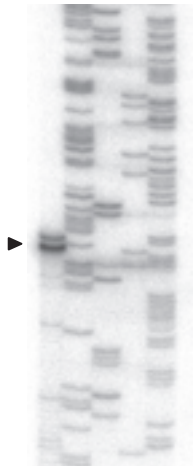MJ0136  
A G C T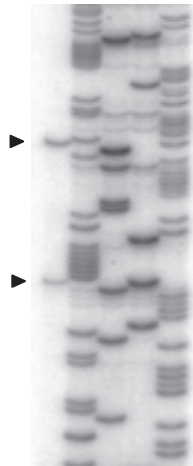MJ0318  
A G C T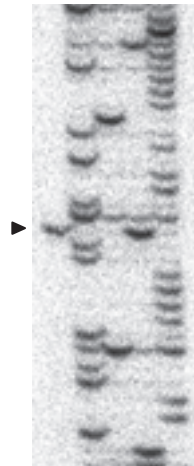MJ0319  
A G C T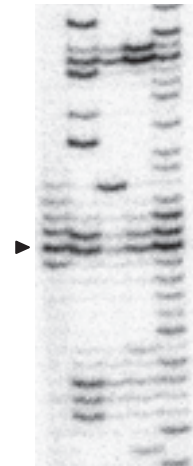MJ0369  
A G C T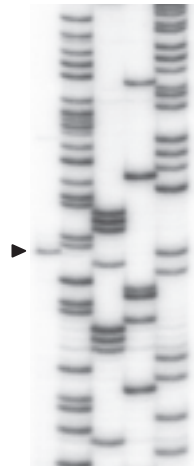MJ0370  
A G C T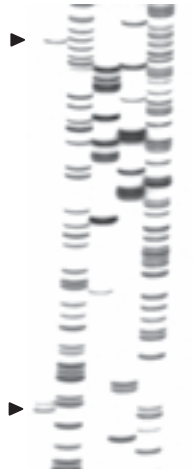MJ0405  
A G C T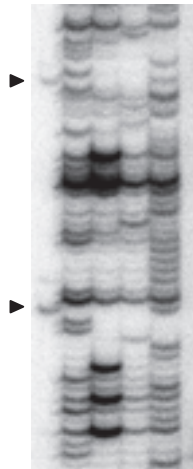MJ0667  
A G C T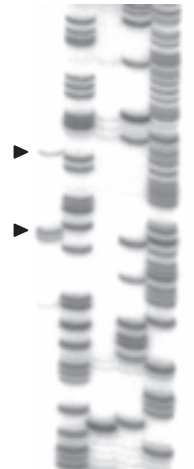MJ0673  
A G C T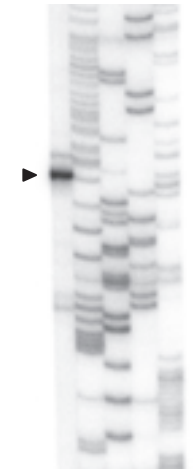MJ0697  
A G C T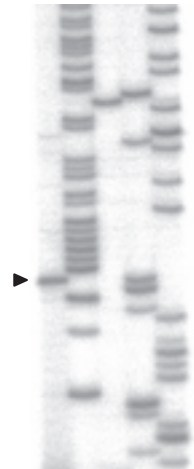

MJ0746  
A G C T

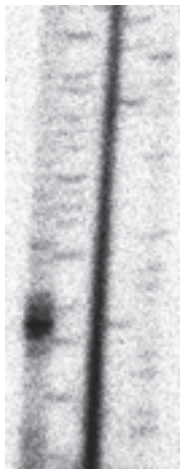

MJ0822  
A G C T

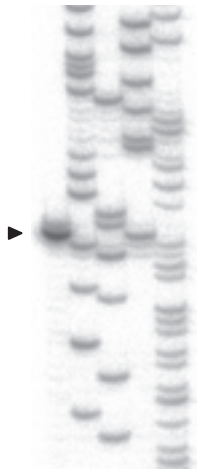

MJ0823  
A G C T

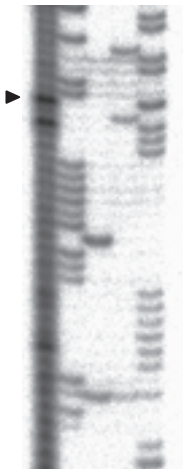

MJ0825  
A G C T

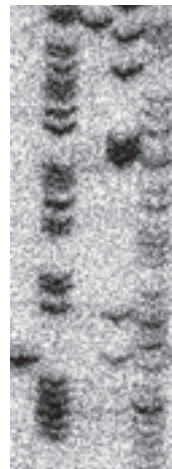

MJ0826  
A G C T

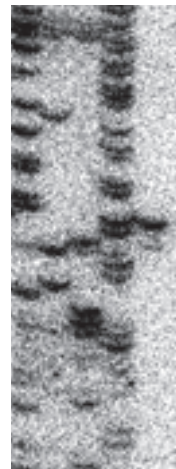

MJ0842  
A G C T

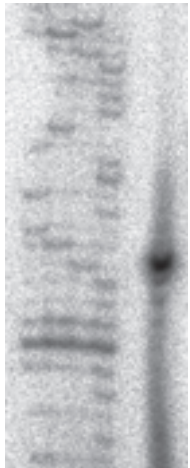

MJ0864  
A G C T

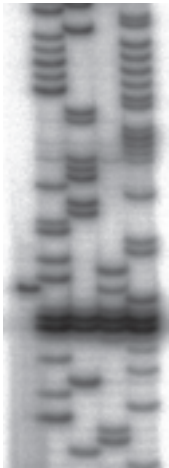

MJ0865  
A G C T

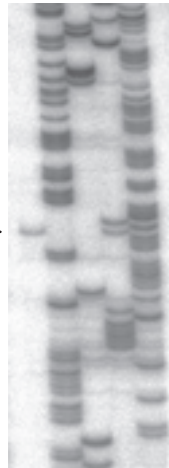

MJ0891  
A G C T

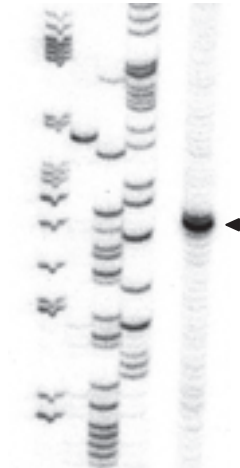

MJ0952  
A G C T

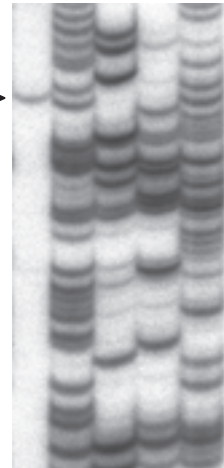

MJ0987  
A G C T

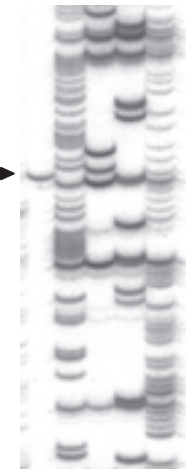

MJ0990  
A G C T

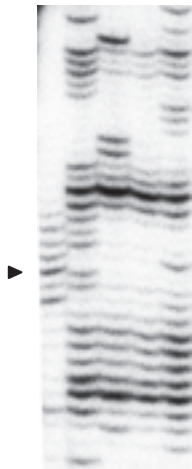

MJ0991  
A G C T

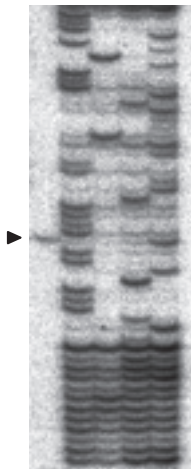

MJ0999  
A G C T

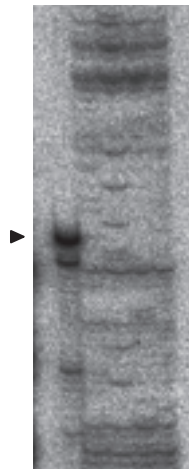

MJ1018  
A G C T

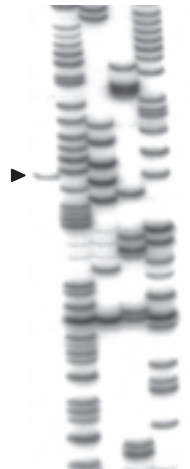

MJ1019  
A G C T

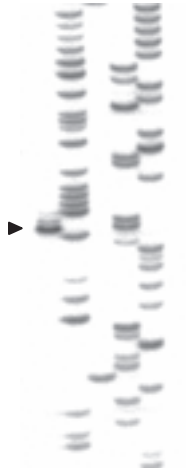

MJ1035  
A G C T

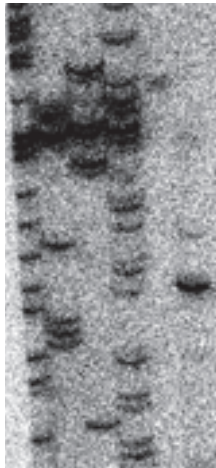

MJ1053  
A G C T

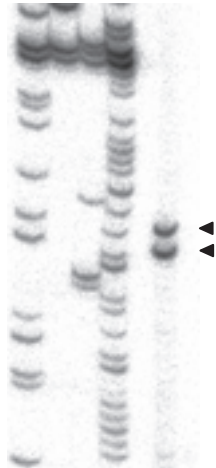

MJ1054  
A G C T

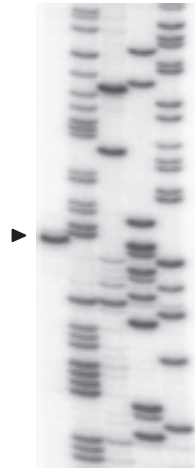

MJ1146  
A G C T

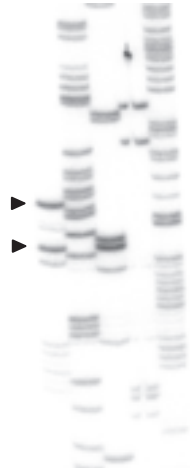

MJ1185  
A G C T

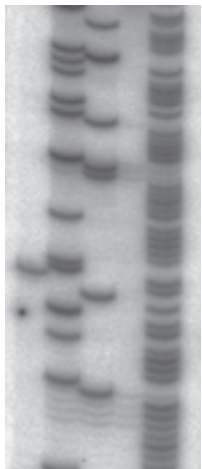

MJ1225  
A G C T

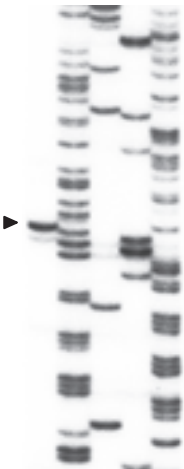

MJ1249  
A G C T

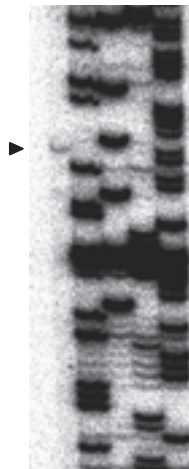

MJ1265  
A G C T

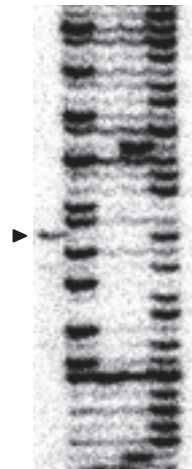

MJ1266  
A G C T

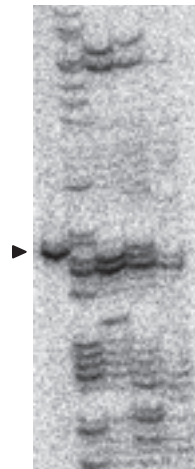

MJ1333  
A G C T

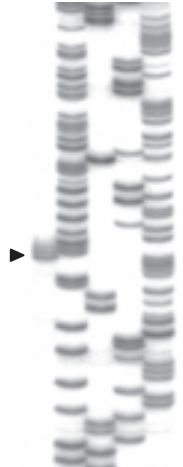

MJ1334  
A G C T

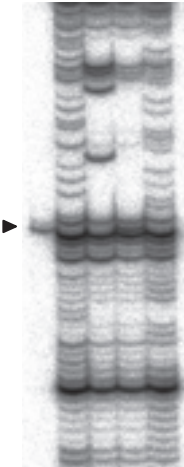

MJ1403  
A G C T

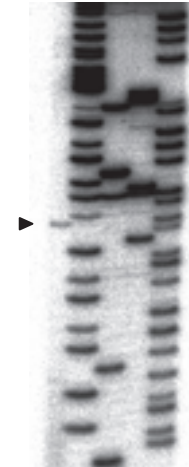

MJ1404  
A G C T

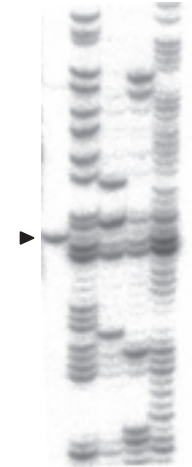

MJ1534  
A G C T

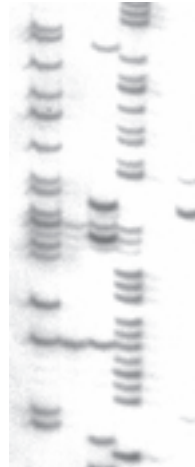

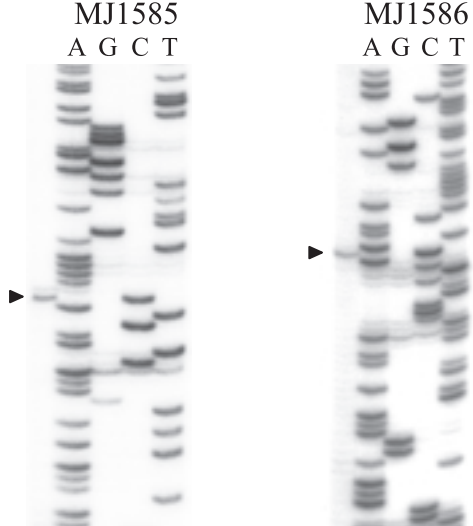

**B**

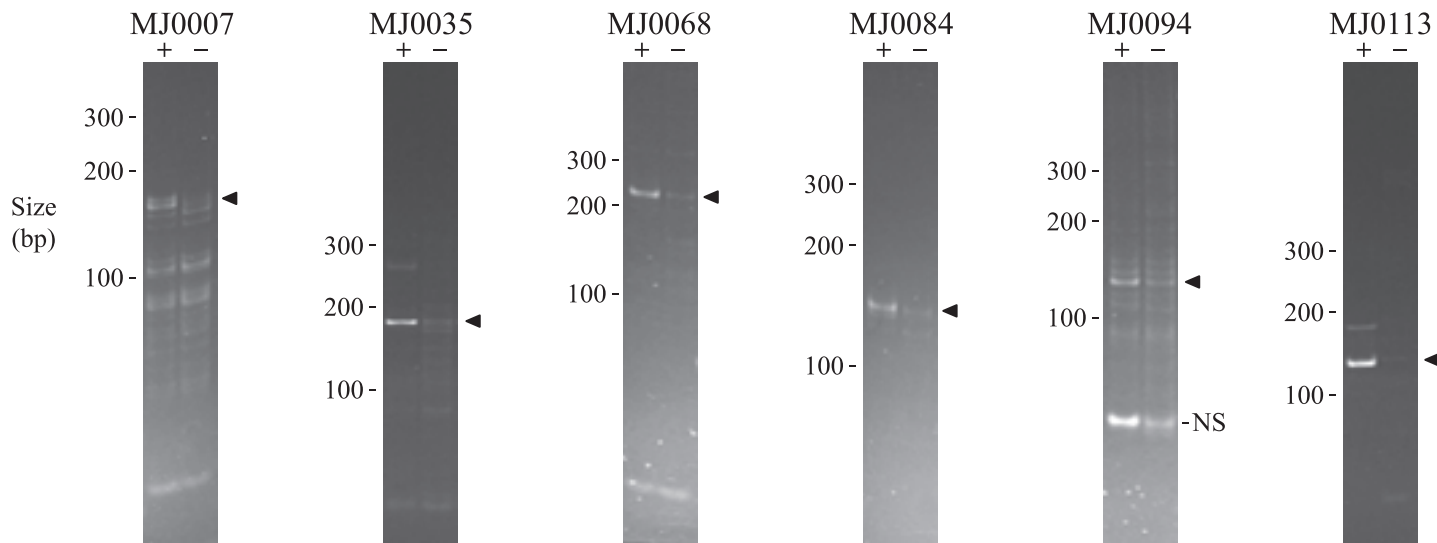

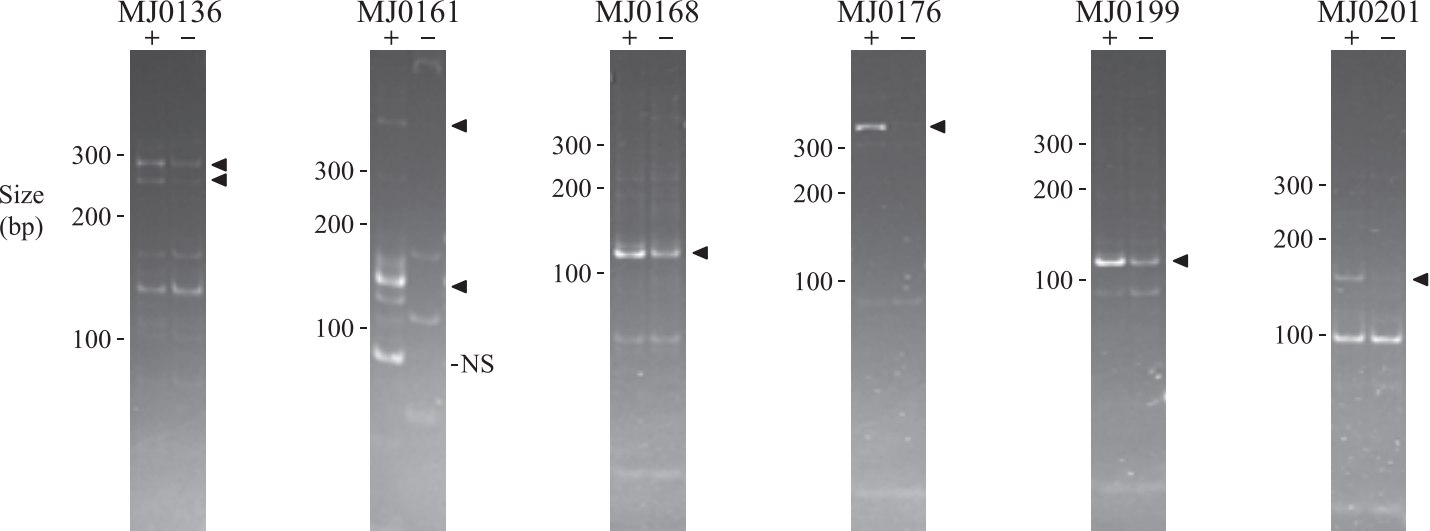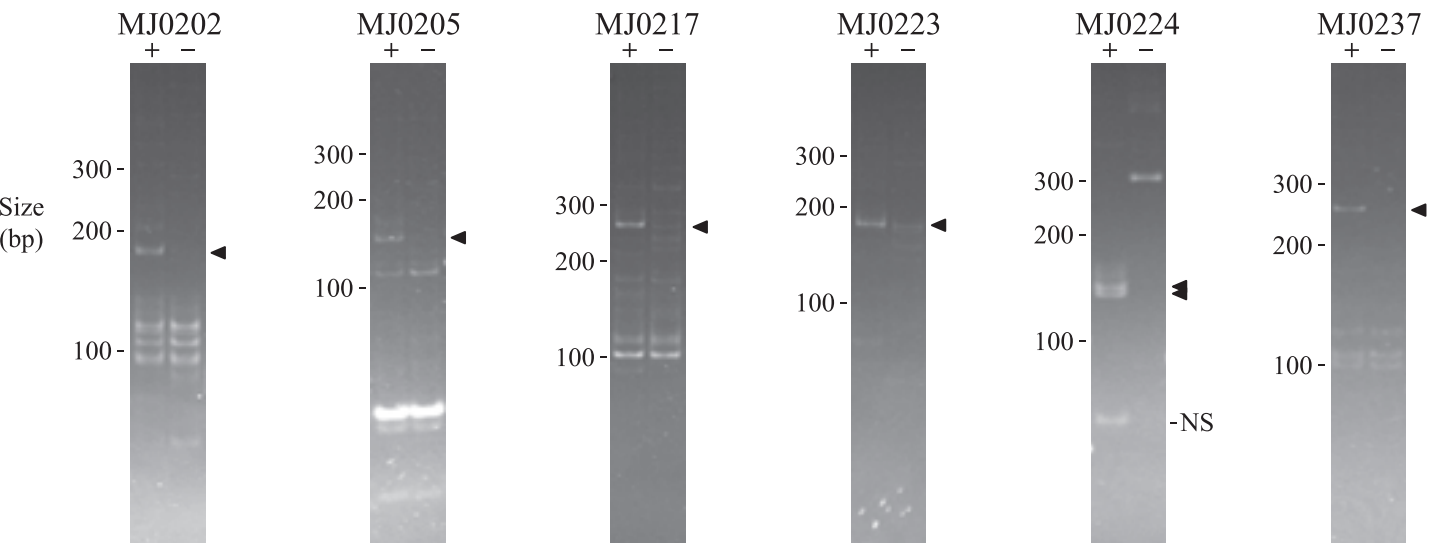

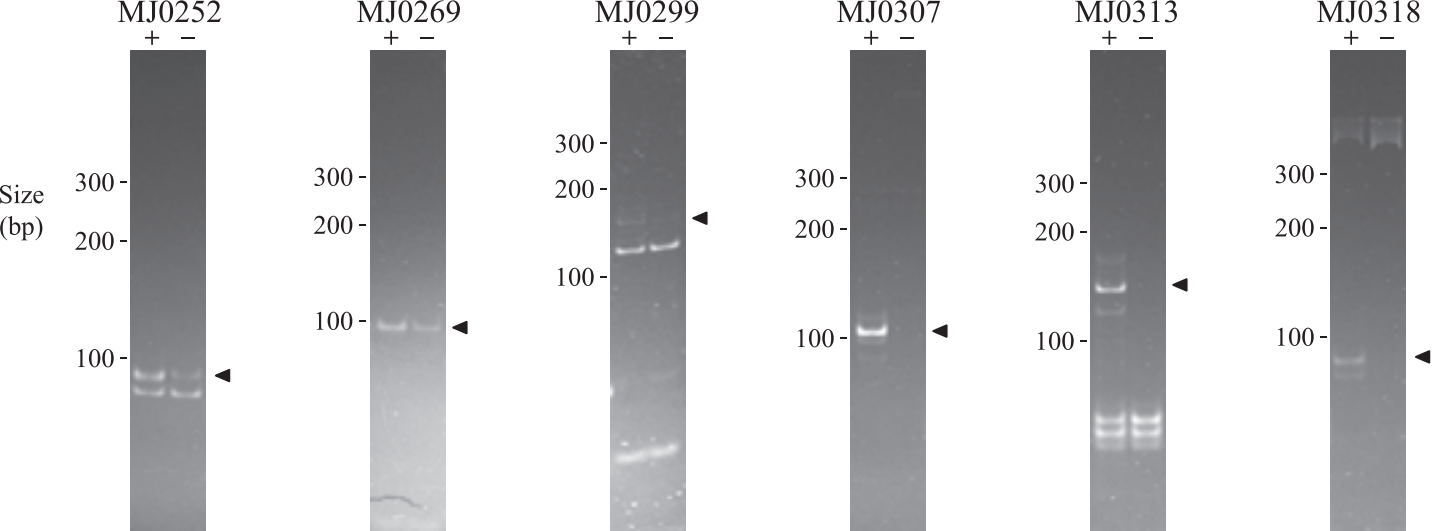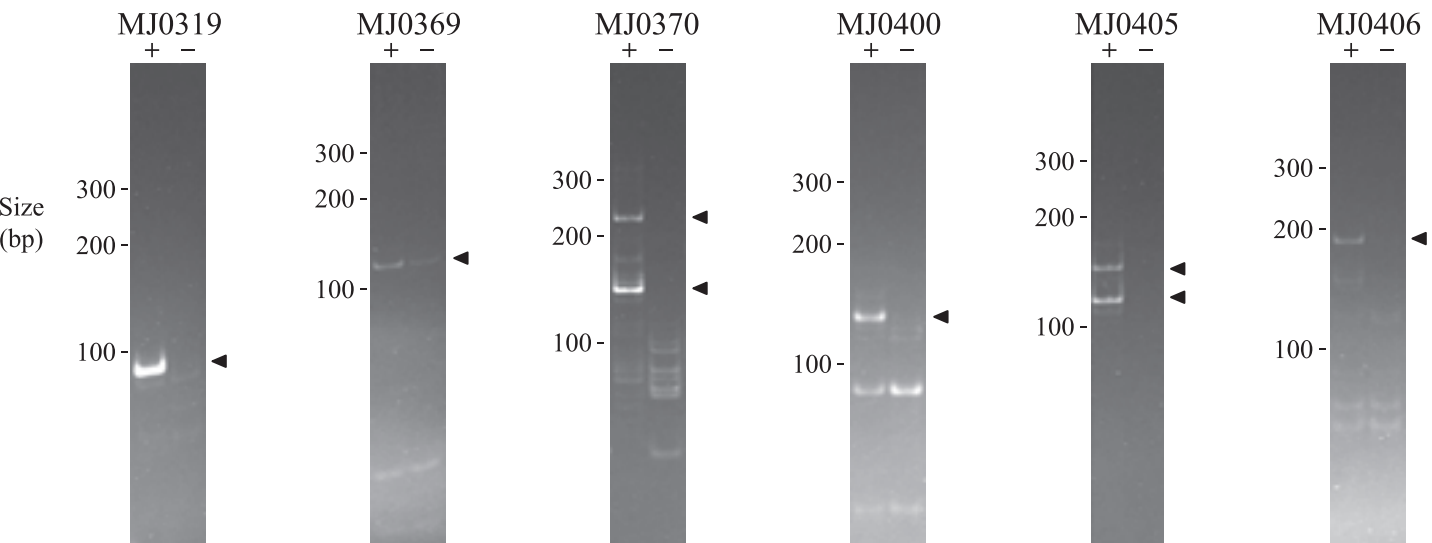

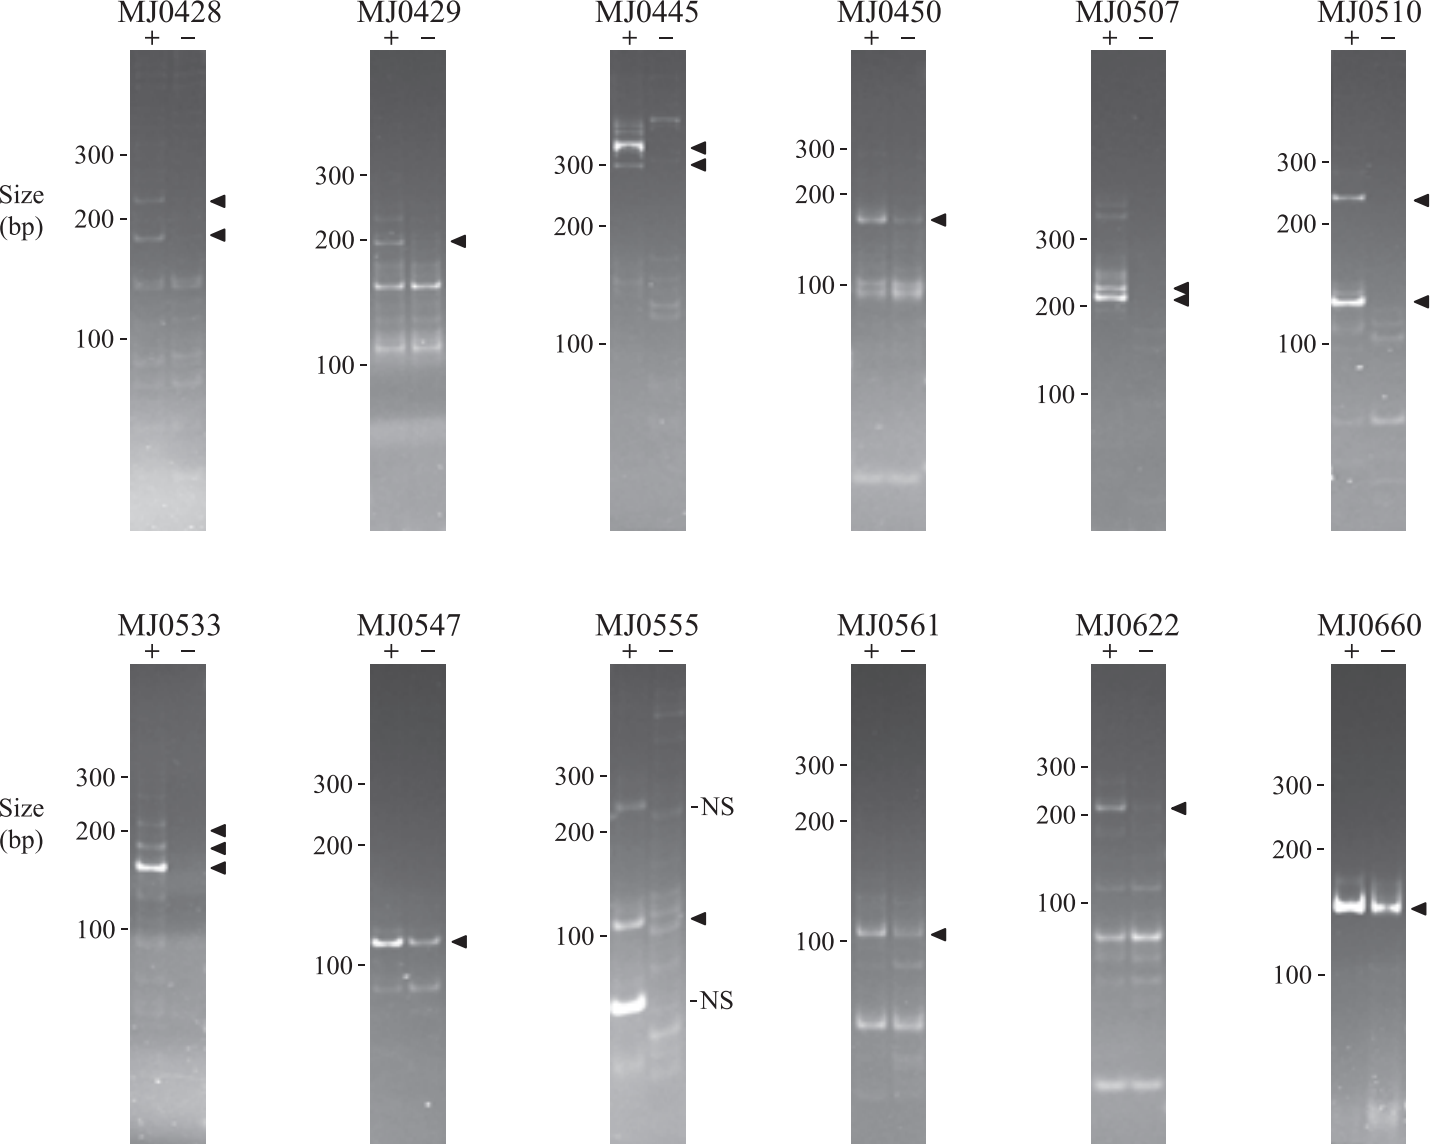



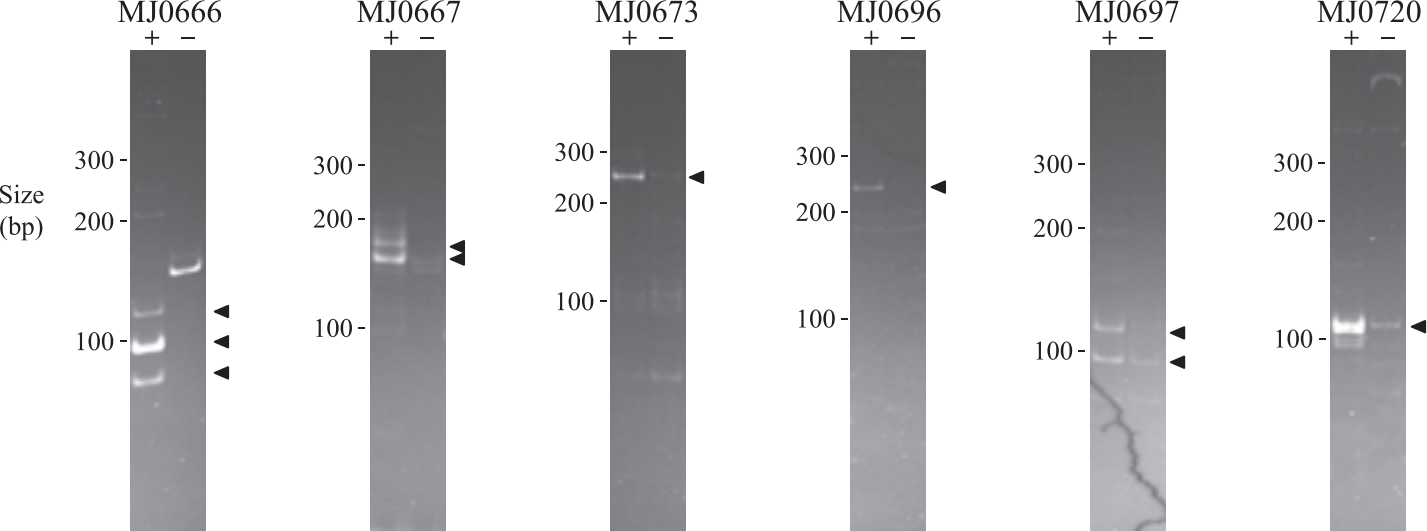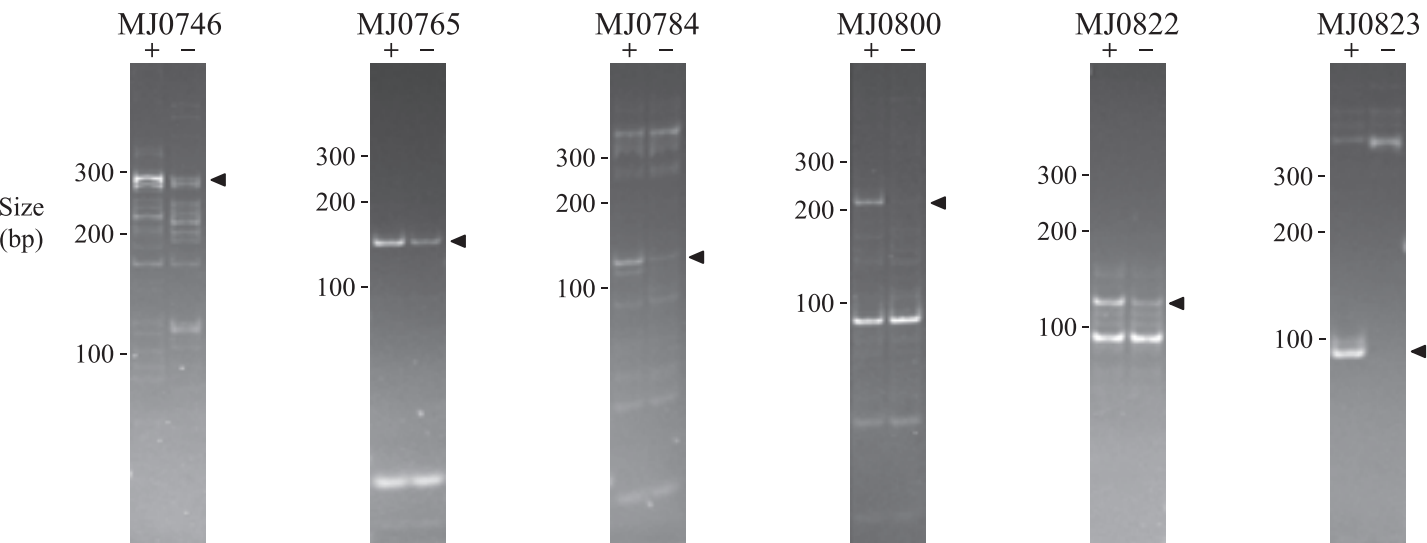

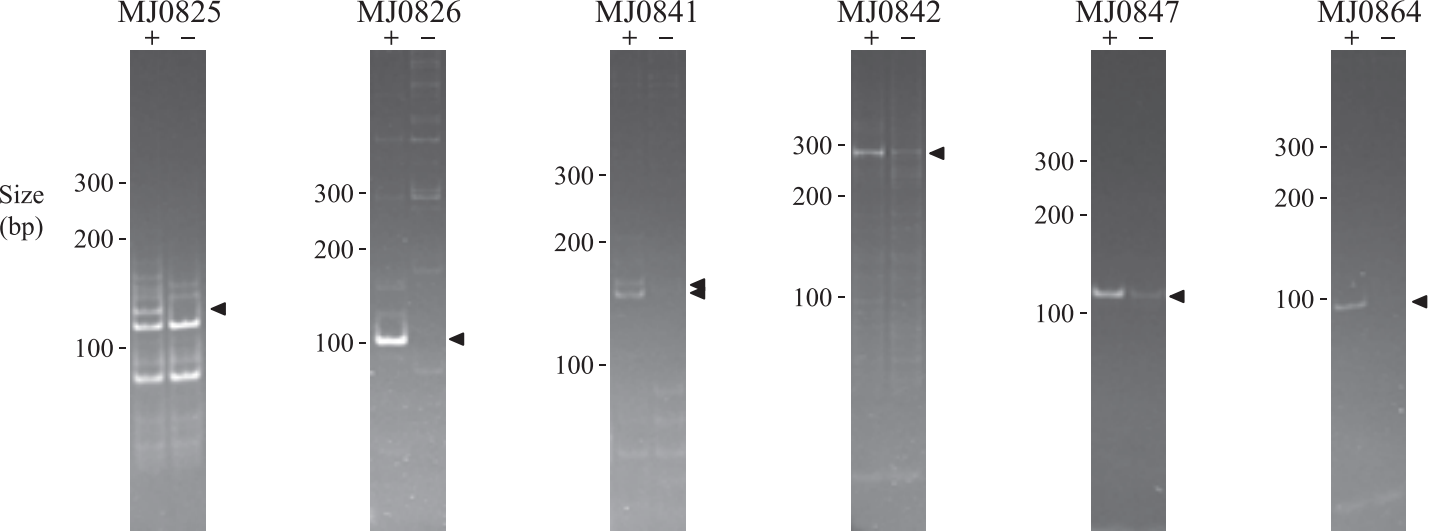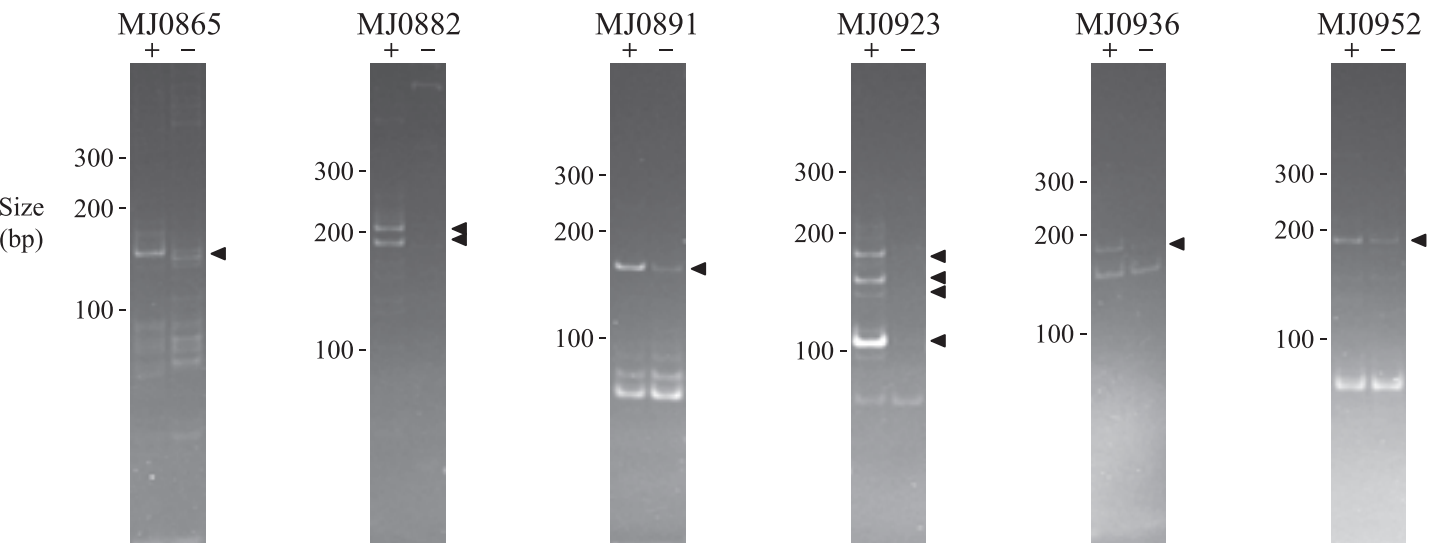

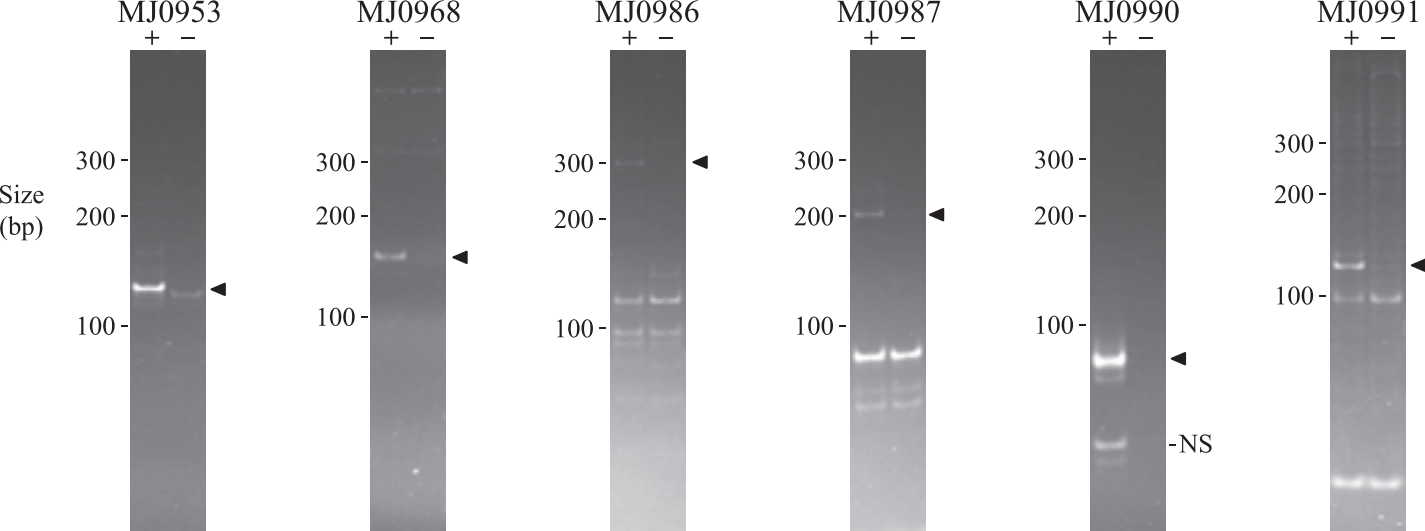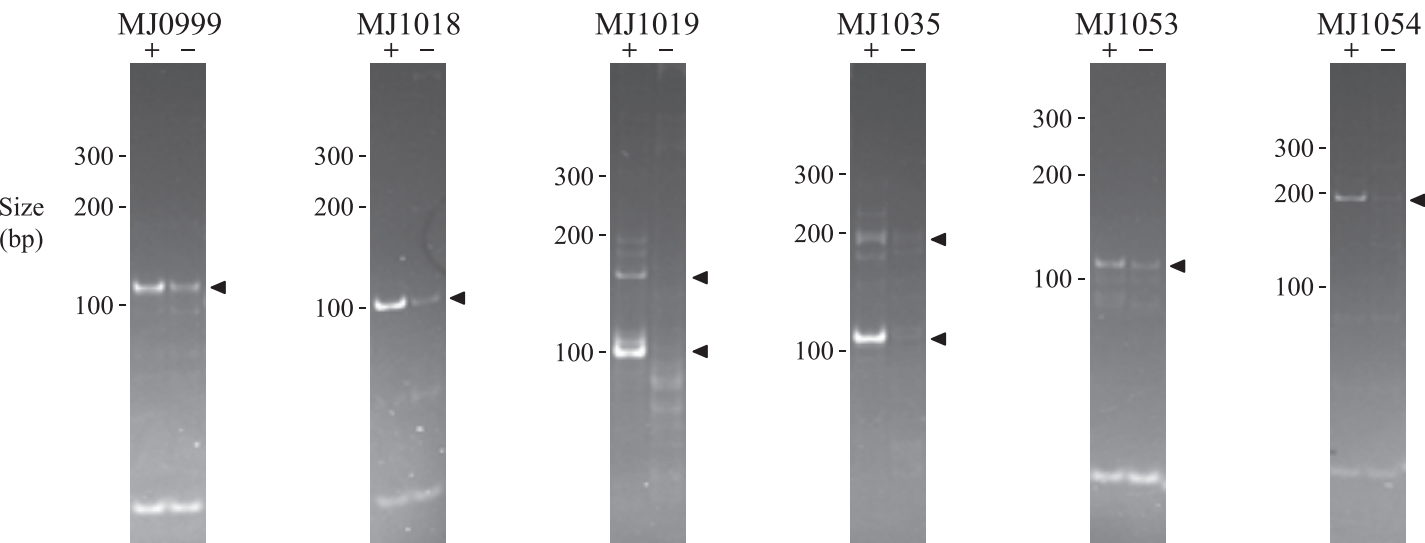

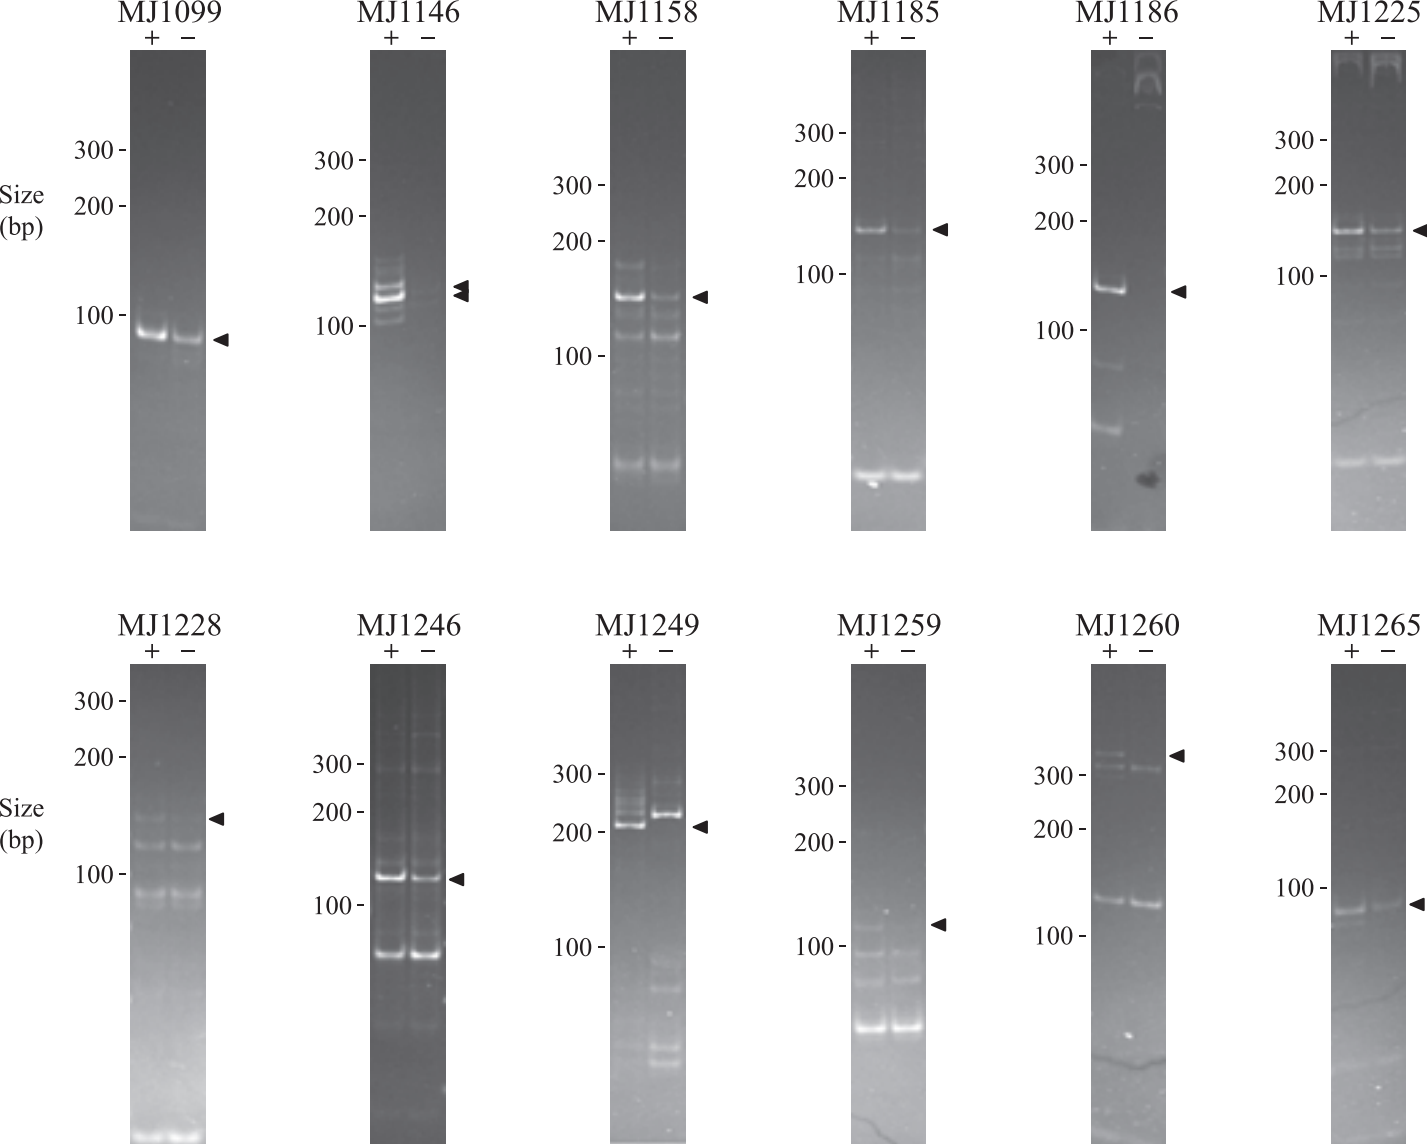

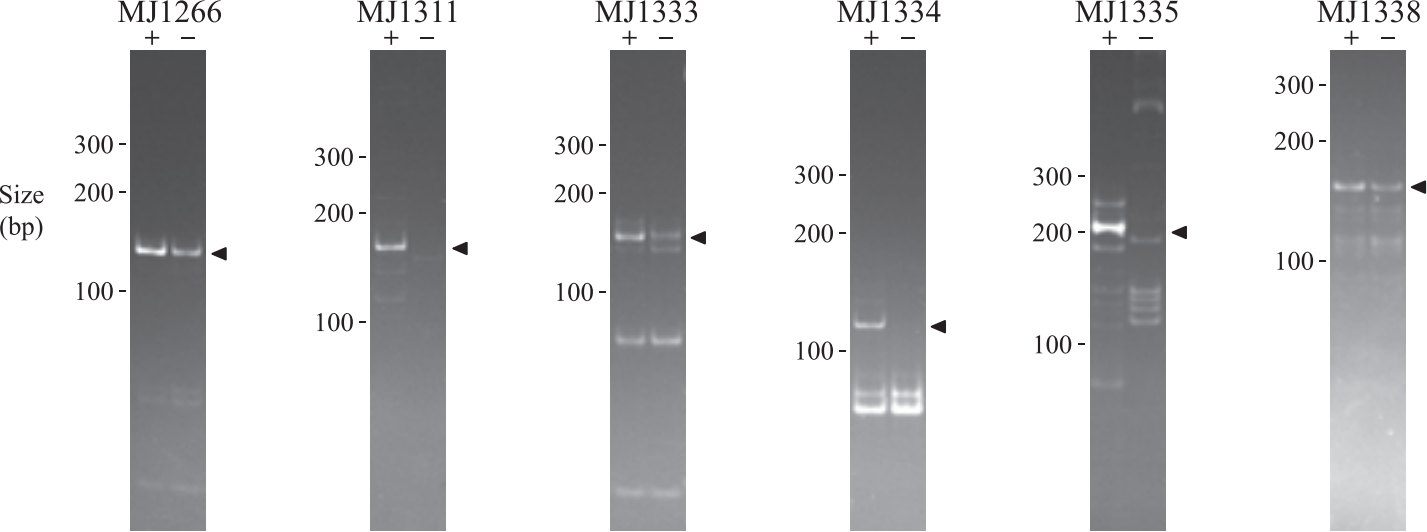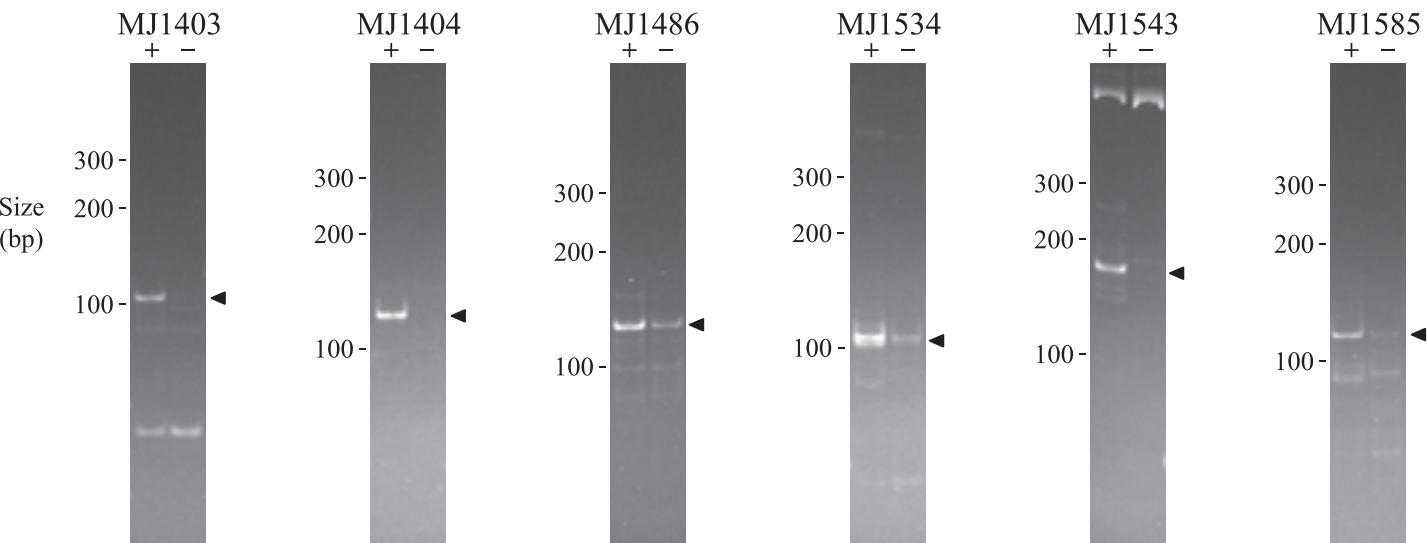

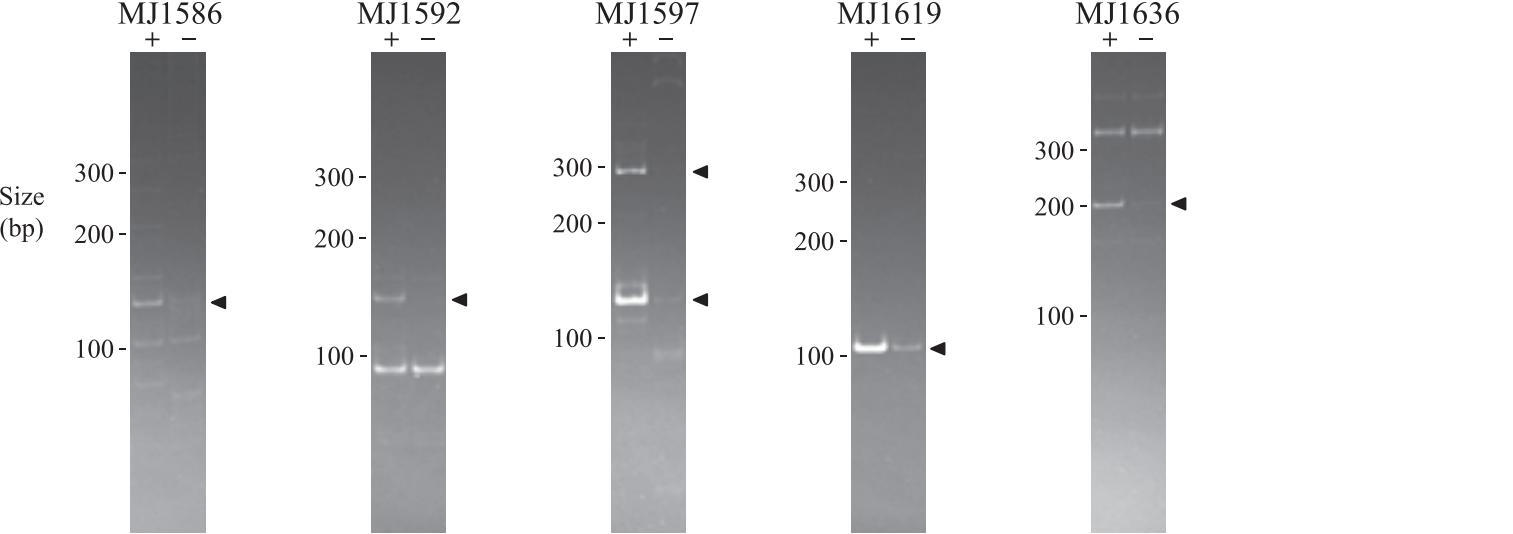

**Figure S1.** Primer extension and 5'-RACE results. **(A)** Primer extension results. Arrowheads indicate runoff transcripts. **(B)** 5'-RACE results. +, RT-PCR products from TAP-treated RNA; -, RT-PCR products from untreated RNA (control). Arrowheads indicate transcription start sites. NS, non-specific band.
