# Supplementary material for: Protein-coding gene promoters in Methanocaldococcus (Methanococcus) jannaschii
Source: PubMed Central journal article supplement — Nucleic Acids Res. 2009 Apr 9;37(11):3588–601. doi: 10.1093/nar/gkp213 (PMC2699501; doi:10.1093/nar/gkp213), 2009-04-09
Supplement: gkp213_8.pdf [file gkp213_8.pdf]

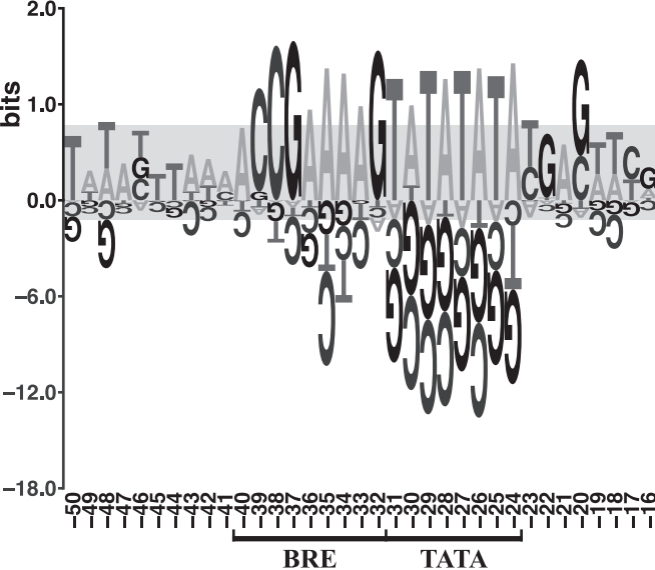

**Figure S2.** PWM logo of the *in vitro* selected promoters (1).

## REFERENCES

1. Li, E., Reich, C.I. and Olsen, G.J. (2008) A whole-genome approach to identifying protein binding sites: promoters in *Methanocaldococcus* (*Methanococcus*) *jannaschii*. *Nucleic Acids Res.*, **36**, 6948–6958.
