# Supplementary material for: Protein-coding gene promoters in Methanocaldococcus (Methanococcus) jannaschii
Source: PubMed Central journal article supplement — Nucleic Acids Res. 2009 Apr 9;37(11):3588–601. doi: 10.1093/nar/gkp213 (PMC2699501; doi:10.1093/nar/gkp213), 2009-04-09
Supplement: gkp213_9.pdf [file gkp213_9.pdf]

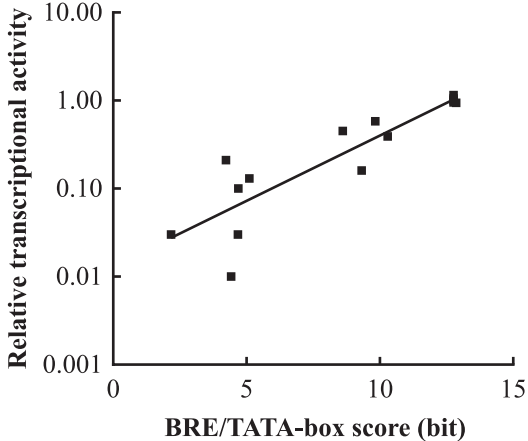

**Figure S3.** Correlation between promoter BRE/TATA-box score and relative *in vitro* transcriptional activity. The vertical position of a point indicates the *in vitro* transcriptional activity of the corresponding promoter, relative to the wild-type *M. vanielii* tRNA<sup>Val</sup> promoter. The horizontal position of a point is the BRE/TATA-box score of the corresponding promoter. The correlation coefficient ( $r$ ) is 0.88, indicating a positive correlation. The equation for the regression line is

$$\log_2(\textit{in vitro} \textit{ transcriptional activity}) = 0.49 \times (\text{BRE/TATA-box score}) - 6.25.$$
